# Supplementary material
Source: publisher figshare collection journal article supplement (https://acs.figshare.com/ndownloader/files/4611157)

## **Supporting Information**

### **Olefin Ring Closing Metathesis and Hydrosilylation Reaction in Aqueous Medium by Grubbs Second Generation Ruthenium Catalyst**

Vivek Polshettiwar and Rajender S. Varma\*

*Sustainable Technology Division, National Risk Management Research Laboratory,*

*U. S. Environmental Protection Agency, MS 443, Cincinnati, Ohio 45268, USA*

*varma.rajender@epa.gov, polshettiwar.vivek@epa.gov*

#### **Contents:**

- S3: Experimental Details and Elemental Analysis
- S4: MS spectrum of 2,5-dihydro-1-tosyl-1H-pyrrole
- S5: <sup>1</sup>H-NMR spectrum of 2,5-dihydro-1-tosyl-1H-pyrrole
- S6: <sup>13</sup>C-NMR spectrum of 2,5-dihydro-1-tosyl-1H-pyrrole
- S7: MS spectrum of 2,2,2-trifluoro-1-(2H-pyrrol-1(5H)-yl)ethanone
- S8: <sup>1</sup>H-NMR spectrum of 2,2,2-trifluoro-1-(2H-pyrrol-1(5H)-yl)ethanone
- S9: <sup>13</sup>C-NMR spectrum of 2,2,2-trifluoro-1-(2H-pyrrol-1(5H)-yl)ethanone
- S10: MS spectrum of tert-butyl 2H-pyrrole-1(5H)-carboxylate
- S11: MS spectrum of 2,5-dihydro-1-(4-chloro benzene sulfo)-1H-pyrrole
- S12: <sup>1</sup>H -NMR spectrum of 2,5-dihydro-1-(4-chloro benzene sulfo)-1H-pyrrole
- S13: <sup>13</sup>C-NMR spectrum of 2,5-dihydro-1-(4-chloro benzene sulfo)-1H-pyrrole
- S14: MS spectrum of 2,5-dihydrofuran
- S15: MS spectrum of 2,5-dihydrothiophene
- S16: MS spectrum of diethyl cyclopent-3-ene-1,1-dicarboxylate
- S17: <sup>1</sup>H -NMR spectrum of diethyl cyclopent-3-ene-1,1-dicarboxylate
- S18: <sup>13</sup>C-NMR spectrum of diethyl cyclopent-3-ene-1,1-dicarboxylate
- S19: MS spectrum of 4-chloro-2-(2H-pyrrol-1(5H)-yl)pyrimidine
- S20: <sup>1</sup>H -NMR spectrum of 4-chloro-2-(2H-pyrrol-1(5H)-yl)pyrimidine
- S21: <sup>13</sup>C-NMR spectrum of 4-chloro-2-(2H-pyrrol-1(5H)-yl)pyrimidine
- S22: MS spectrum of triethyl(styryl)silane
- S23: <sup>1</sup>H -NMR spectrum of triethyl(styryl)silane

- S24: MS spectrum of (4-fluorostyryl)triethylsilane
- S25:  $^1\text{H}$  -NMR spectrum of (4-fluorostyryl)triethylsilane
- S26: MS spectrum of (4-methoxystyryl)triethylsilane
- S27:  $^1\text{H}$  -NMR spectrum of (4-methoxystyryl)triethylsilane
- S28: MS spectrum of triphenyl(styryl)silane
- S29:  $^1\text{H}$  -NMR spectrum of triphenyl(styryl)silane
- S30: MS spectrum of (4-fluorostyryl)triphenylsilane
- S31:  $^1\text{H}$  -NMR spectrum of (4-fluorostyryl)triphenylsilane
- S32: MS spectrum of (4-methoxystyryl)triphenylsilane
- S33:  $^1\text{H}$  -NMR spectrum of (4-methoxystyryl)triphenylsilane
- S34: MS spectrum of 6-(triethylsilyl)vinylquinoxaline
- S35:  $^1\text{H}$  -NMR spectrum of 6-(triethylsilyl)vinylquinoxaline

### **Experimental Details and Elemental analysis:**

All starting materials were used as obtained. TLC (silica gel; 5 % EtOAc: Hexane) and GC-MS were used to monitor the reactions. The crude products were identified by GC/MS qualitative analysis using a GC system with a Mass selective detector. The identities were further confirmed by  $^1\text{H}$  and  $^{13}\text{C}$  NMR spectra that were recorded in chloroform-*d* ( $\text{CDCl}_3$ ) with TMS as internal reference.

Typical experimental procedure for olefin ring closing metathesis reaction: The diene (1 mmol) and Grubbs second generation ruthenium catalyst (4 mol%) were added in a 10 mL glass tube filled with 2 mL of water and the reaction mixture was stirred for 2 hrs at 45  $^\circ\text{C}$ . After completion of the reaction, the reaction mixture was quenched with ether and product was purified by column chromatography.

Typical experimental procedure for hydrosilylation reaction of alkyne: The alkyne (1 mmol), silane (1 mmol), and Grubbs second generation ruthenium catalyst (4 mol%) were added in a 10 mL glass tube filled with 2 mL of water and the reaction mixture was stirred at 50  $^\circ\text{C}$ . The reaction was complete within 4 hrs in the case of triethylsilane and was complete in 6 h for triphenylsilane. After completion of the reaction, the reaction mixture was quenched with ether and product was purified by column chromatography.

| Product Name                                      | Molecular Formula                                 | Calculated                    | Found                         |
|---------------------------------------------------|---------------------------------------------------|-------------------------------|-------------------------------|
| 2,5-Dihydro-1-tosyl-1H-pyrrole                    | $\text{C}_{11}\text{H}_{13}\text{NO}_2\text{S}$   | C, 59.17; H, 5.87; N, 6.27 %  | C, 59.12; H, 5.80; N, 6.19 %. |
| 2,2,2-Trifluoro-1-(2H-pyrrol-1(5H)-yl)ethanone    | $\text{C}_6\text{H}_6\text{F}_3\text{NO}$         | C, 43.65; H, 3.66; N, 8.48 %  | C, 43.52; H, 3.59; N, 8.54 %  |
| <i>tert</i> -Butyl 2H-pyrrole-1(5H)-carboxylate   | $\text{C}_{11}\text{H}_{19}\text{NO}_2$           | C, 66.97; H, 9.71; N, 7.10 %  | C, 66.82; H, 9.76; N, 7.13 %  |
| 2,5-Dihydro-1-(4-chloro benzene sulfo)-1H-pyrrole | $\text{C}_{10}\text{H}_{10}\text{ClNO}_2\text{S}$ | C, 49.28; H, 4.14; N, 5.75 %  | C, 49.19; H, 4.11; N, 5.80 %  |
| 4-Chloro-2-(2H-pyrrol-1(5H)-yl)pyrimidine         | $\text{C}_8\text{H}_8\text{ClN}_3$                | C, 52.90; H, 4.44; N, 23.14 % | C, 52.93; H, 4.39; N, 23.18 % |
| Triethyl(styryl)silane                            | $\text{C}_{14}\text{H}_{22}\text{Si}$             | C, 76.99; H, 10.15 %          | C, 76.89; H, 10.20%.          |
| (4-Fluorostyryl)triethylsilane                    | $\text{C}_{14}\text{H}_{21}\text{FSi}$            | C, 71.13; H, 8.95 %           | C, 71.09; H, 8.89 %           |
| (4-Methoxystyryl)triethylsilane                   | $\text{C}_{15}\text{H}_{24}\text{OSi}$            | C, 72.52; H, 9.74 %           | C, 72.49; H, 9.69 %           |
| Triphenyl(styryl)silane                           | $\text{C}_{26}\text{H}_{22}\text{Si}$             | C, 86.14; H, 6.12 %           | C, 86.18; H, 6.17 %           |
| (4-Fluorostyryl)triphenylsilane                   | $\text{C}_{26}\text{H}_{21}\text{FSi}$            | C, 82.06; H, 5.56 %           | C, 82.10; H, 5.49 %           |
| (4-Methoxystyryl)triphenylsilane                  | $\text{C}_{27}\text{H}_{24}\text{OSi}$            | C, 82.61; H, 6.16 %           | C, 82.65; H, 6.19 %           |
| 6-(triethylsilyl)vinylquinoxaline                 | $\text{C}_{16}\text{H}_{22}\text{N}_2\text{Si}$   | C, 71.06; H, 8.20; N, 10.36   | C, 71.13; H, 8.16; N, 10.29 % |

# MS spectrum of 2,5-dihydro-1-tosyl-1H-pyrrole:

File :C:\Vivek\Vivek-May\VGR5-RT-f1.D  
Operator : VIVEK  
Acquired : 24 May 2008 11:41 am using AcqMethod PSSA.M  
Instrument : GC\_MS  
Sample Name: VGR5-RT-f1  
Misc Info :  
Vial Number: 30

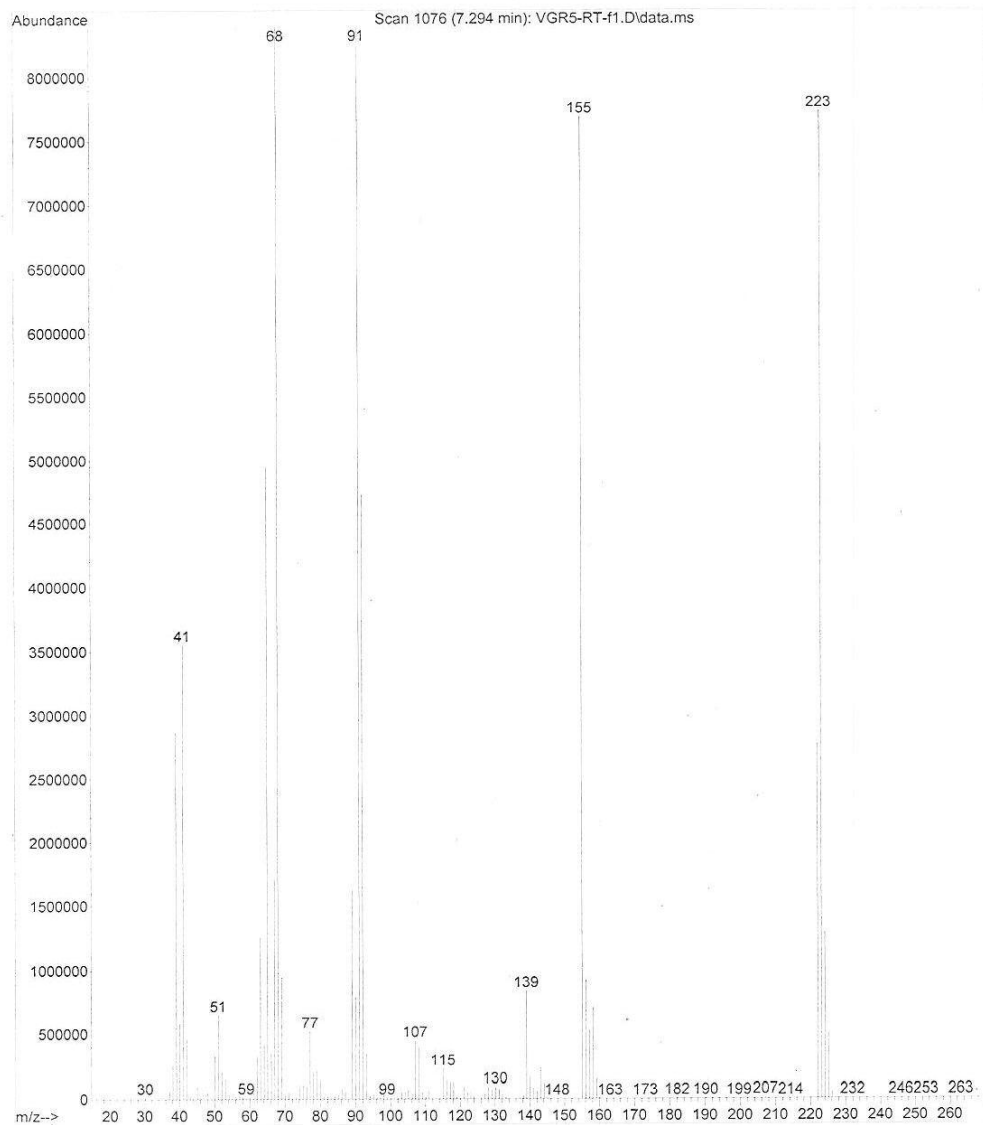

**<sup>1</sup>H-NMR spectrum of 2,5-dihydro-1-tosyl-1H-pyrrole:**

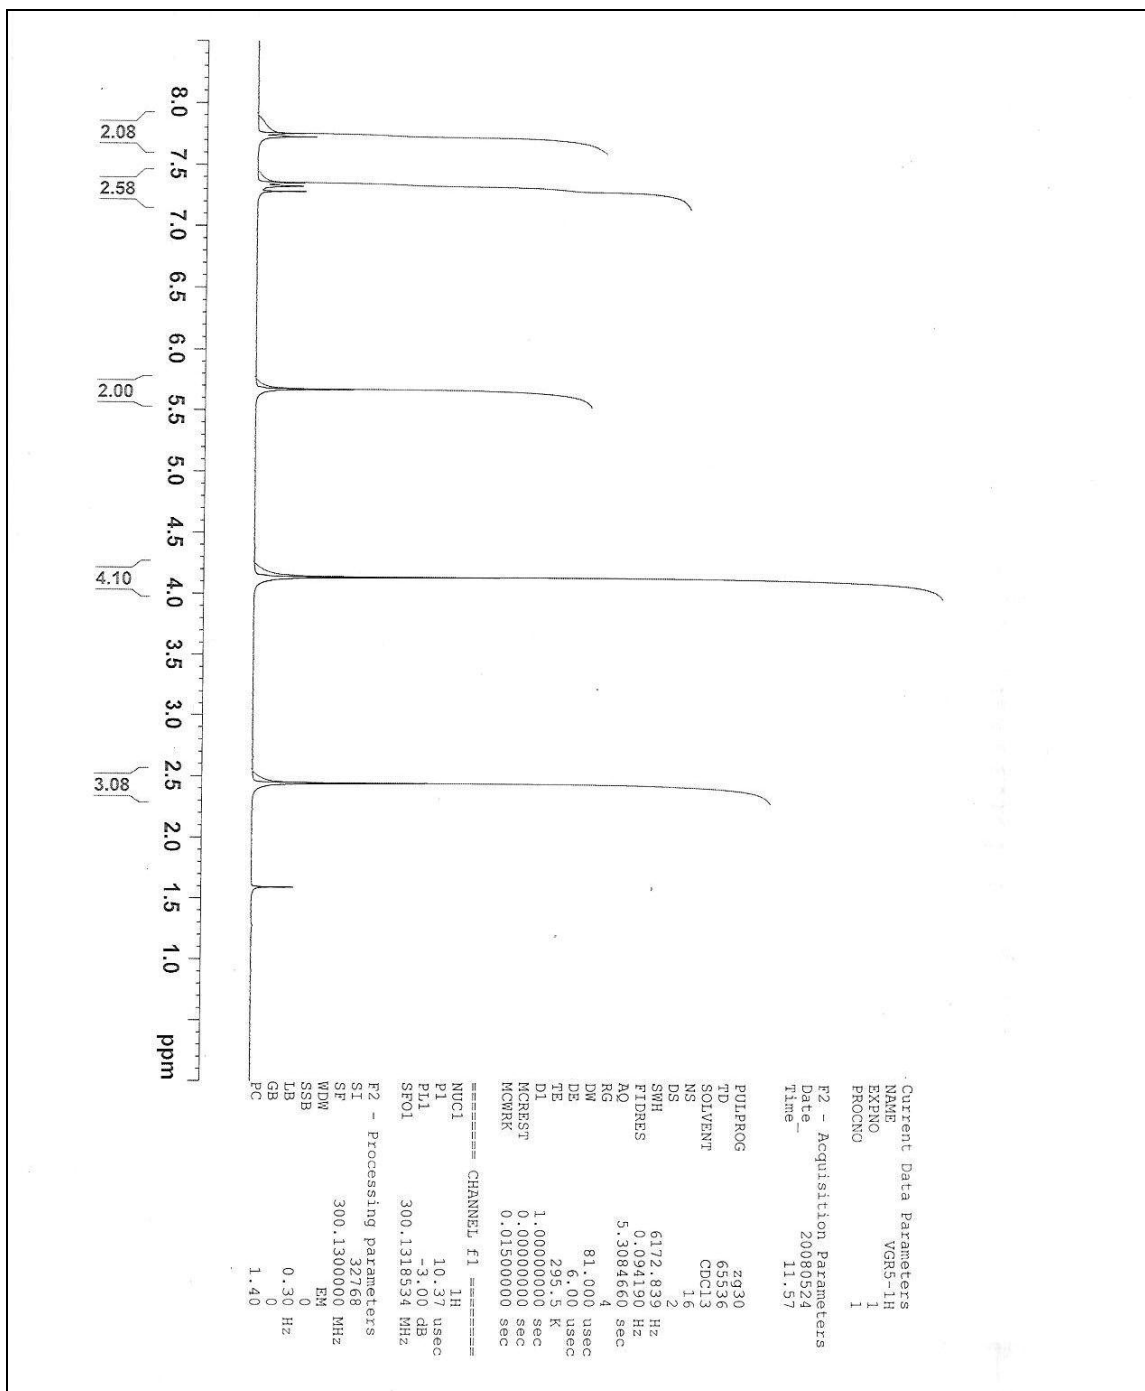

**$^{13}\text{C}$ -NMR spectrum of 2,5-dihydro-1-tosyl-1H-pyrrole:**

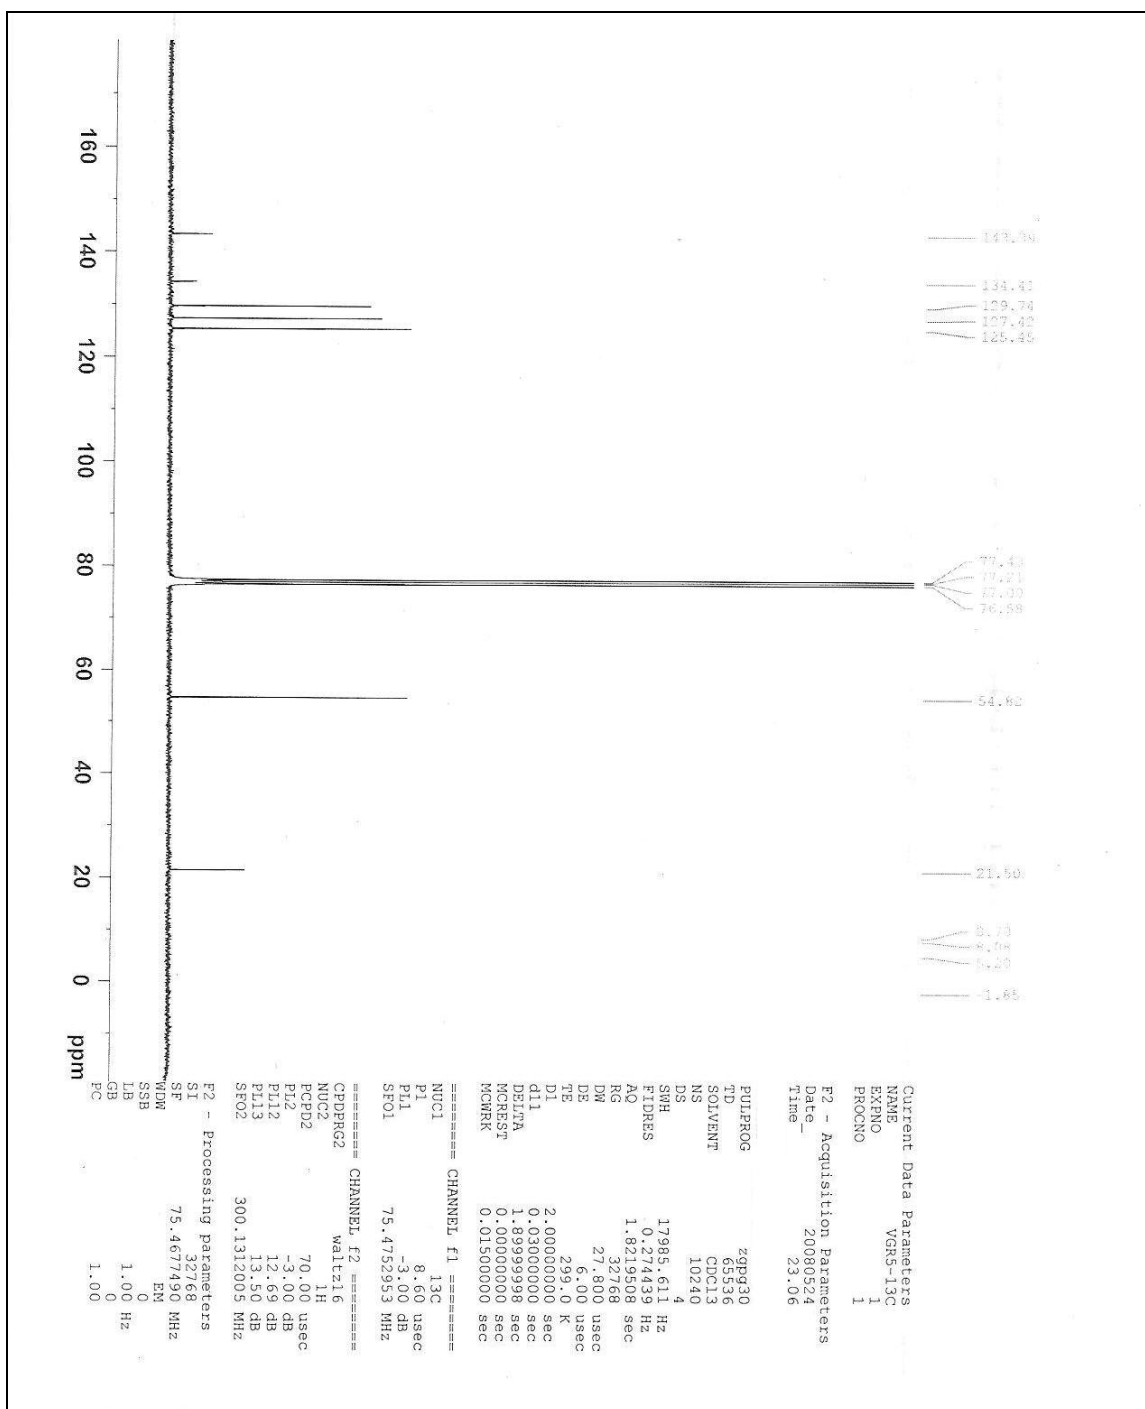

**MS spectrum of 2,2,2-trifluoro-1-(2H-pyrrol-1(5H)-yl)ethanone:**

File :C:\Vivek\Vivek-May\VGR2-fin-d.D  
Operator : VIVEK  
Acquired : 22 May 2008 4:25 pm using AcqMethod PSSA.M  
Instrument : GC\_MS  
Sample Name: VGR2-fin-d  
Misc Info :  
Vial Number: 29

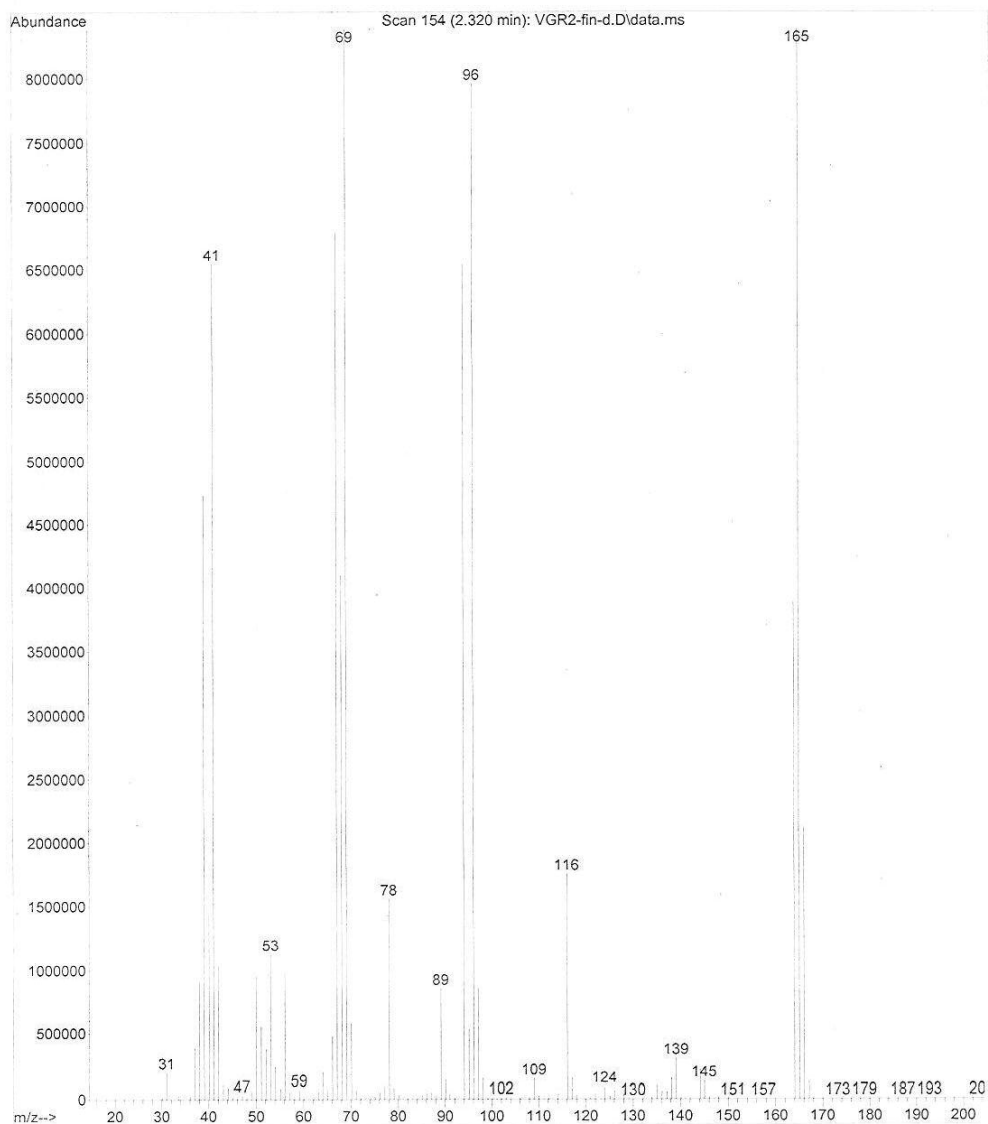

<sup>1</sup>H-NMR spectrum of 2,2,2-trifluoro-1-(2H-pyrrol-1(5H)-yl)ethanone

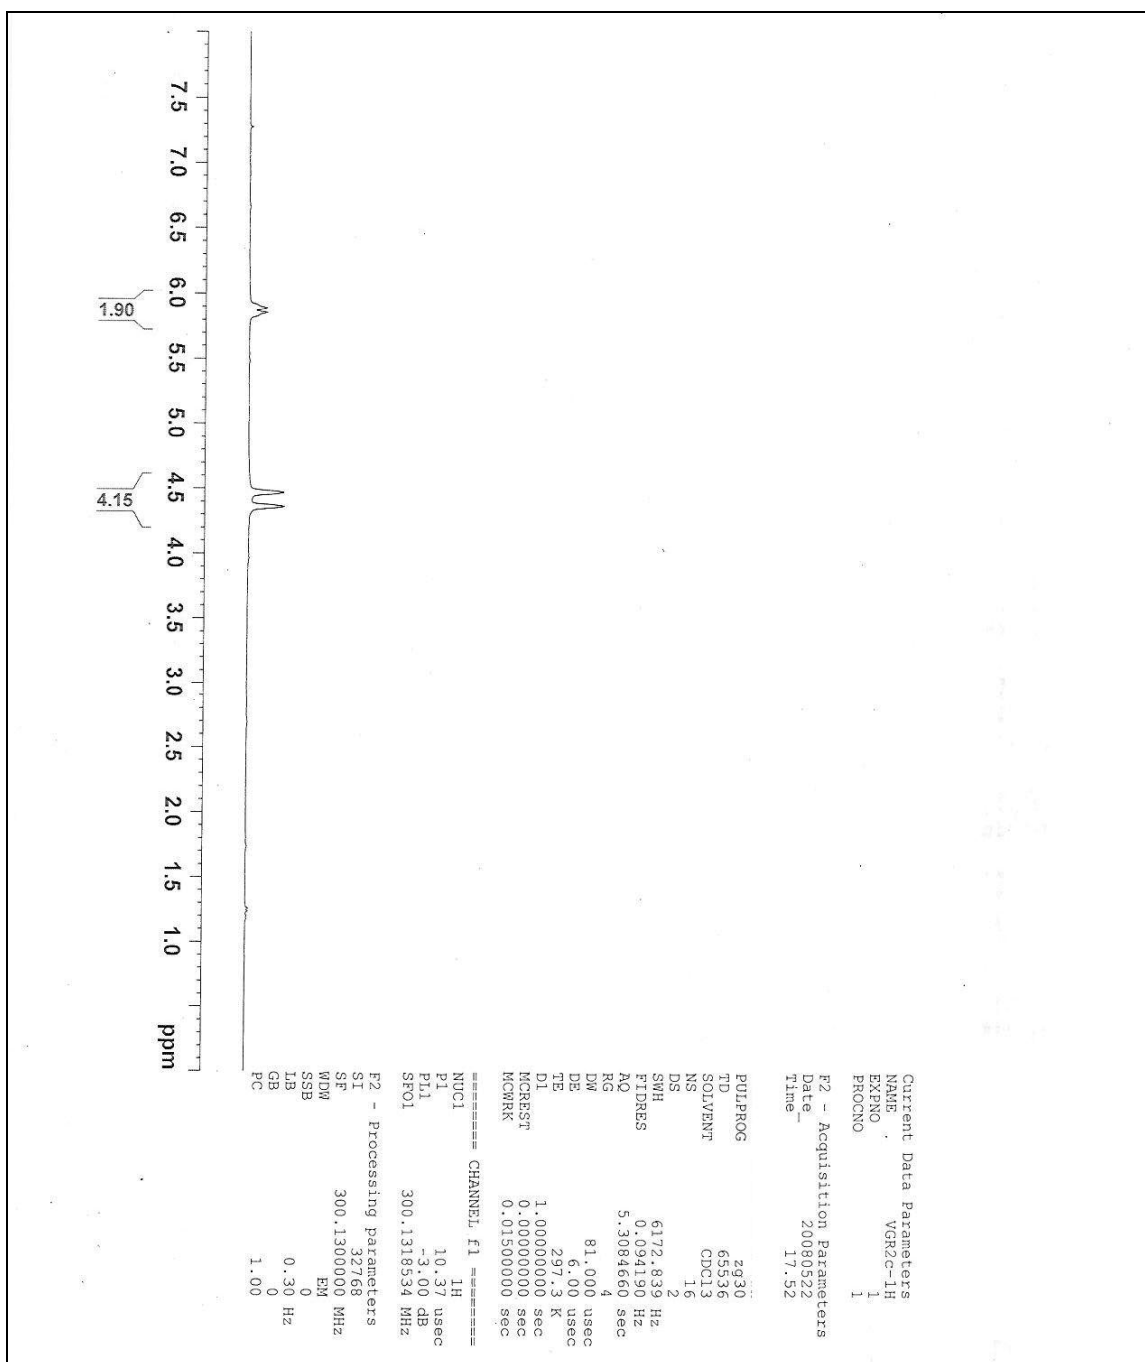



**$^{13}\text{C}$ -NMR spectrum of 2,2,2-trifluoro-1-(2H-pyrrol-1(5H)-yl)ethanone:**

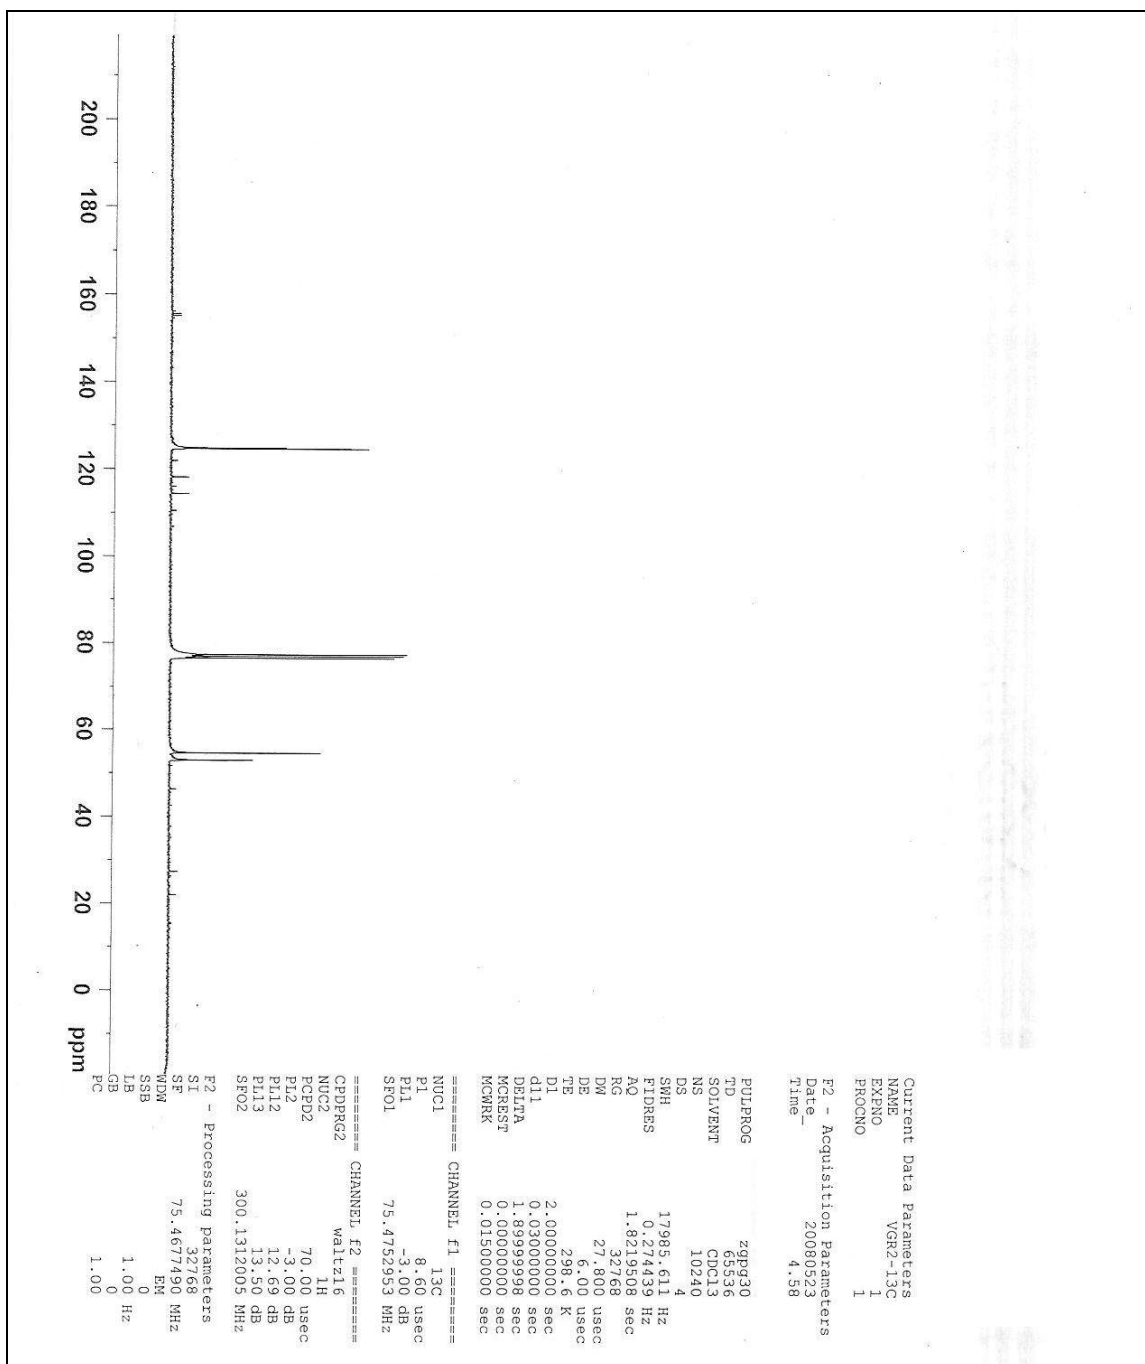

# MS spectrum of tert-butyl 2H-pyrrole-1(5H)-carboxylate

File :C:\Vivek\Vivek-June-08\VGR36-e.D  
Operator : Vivek  
Acquired : 11 Jun 2008 1:08 pm using AcqMethod PSSA.M  
Instrument : GC\_MS  
Sample Name: VGR36-e  
Misc Info :  
Vial Number: 28

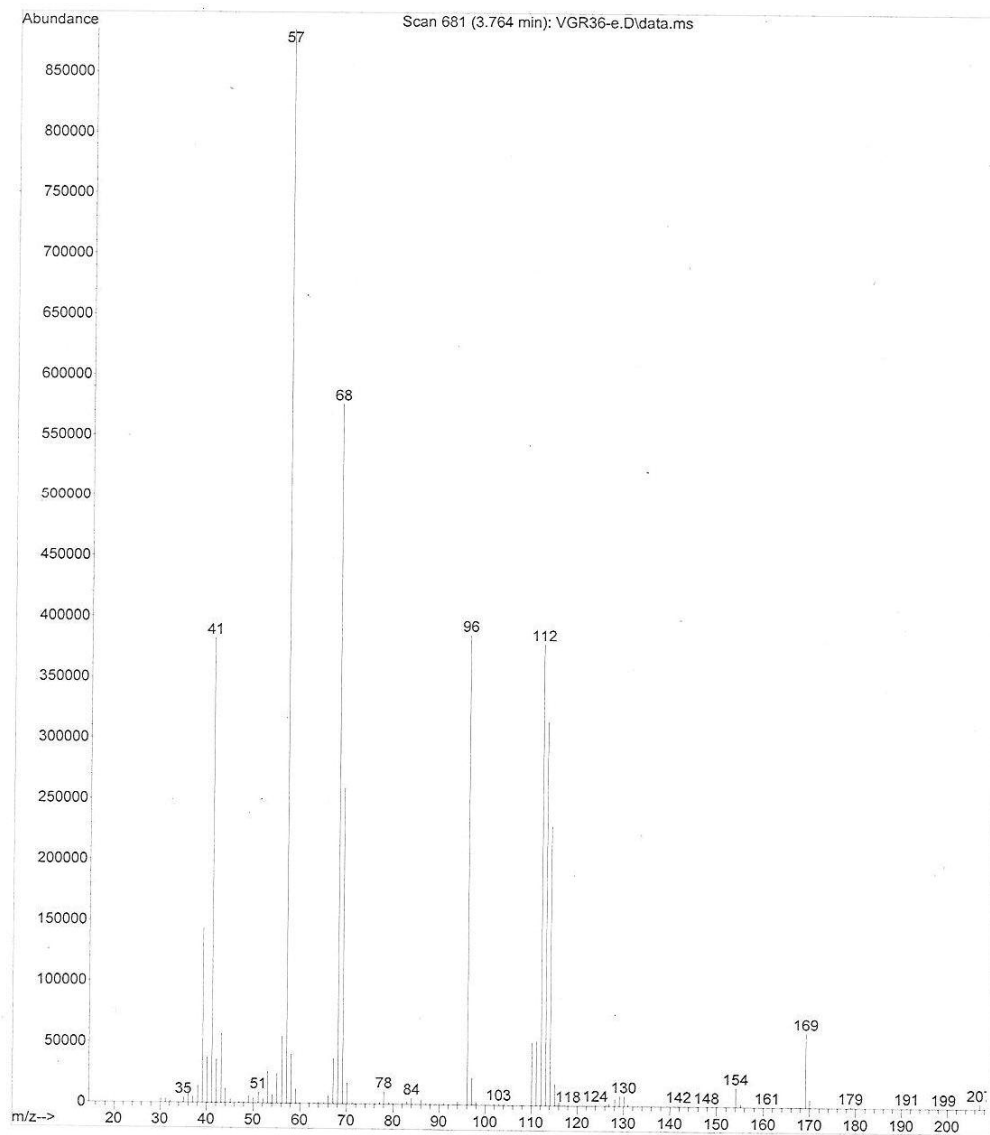

# MS spectrum of 2,5-dihydro-1-(4-chloro benzene sulfo)-1H-pyrrole

File :C:\Vivek\Vivek-June-08\VGR32f0.D  
Operator : Vivek  
Acquired : 10 Jun 2008 9:52 am using AcqMethod PSSA.M

Sample Name: VGR32f0  
Misc Info :  
Vial Number: 30

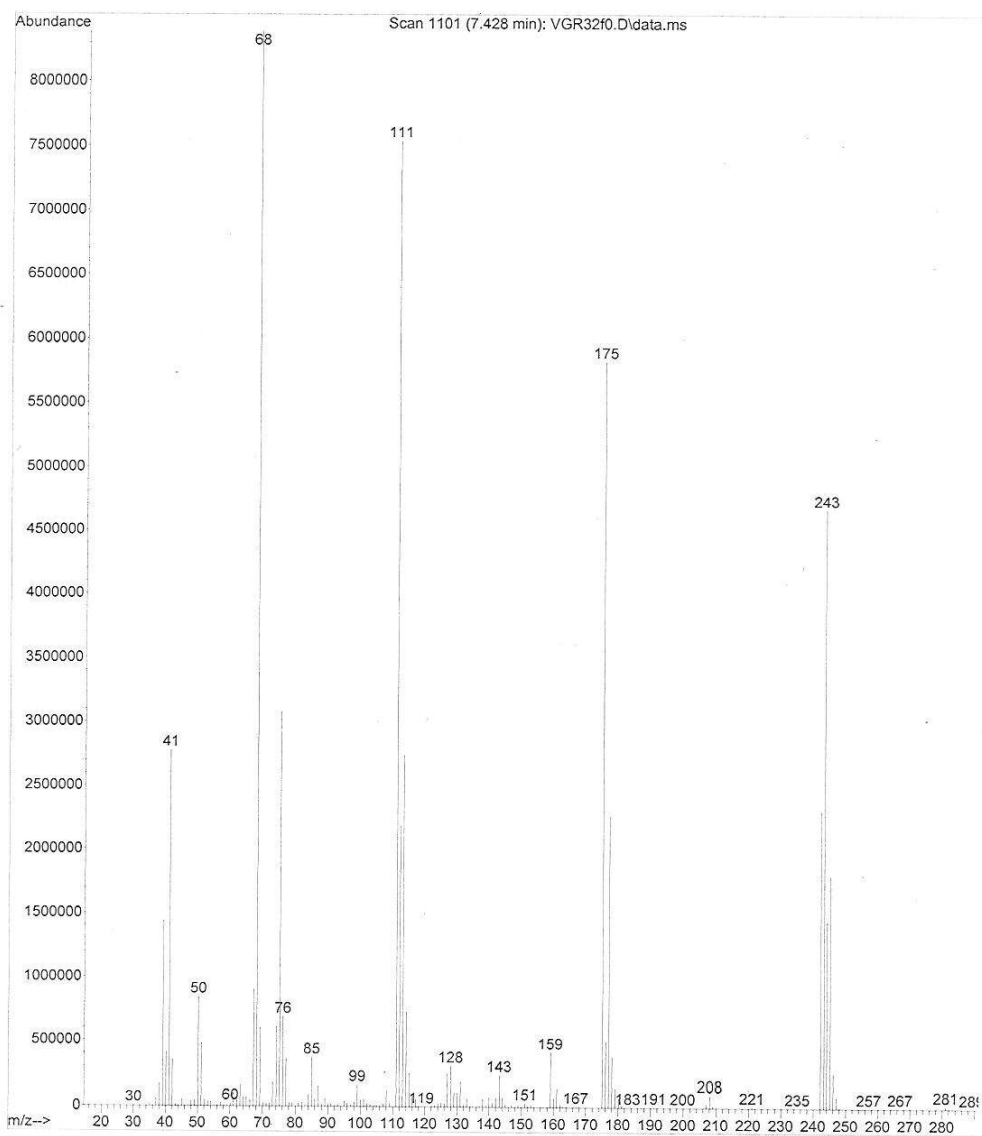

**$^1\text{H}$  -NMR spectrum of 2,5-dihydro-1-(4-chloro benzene sulfo)-1H-pyrrole**

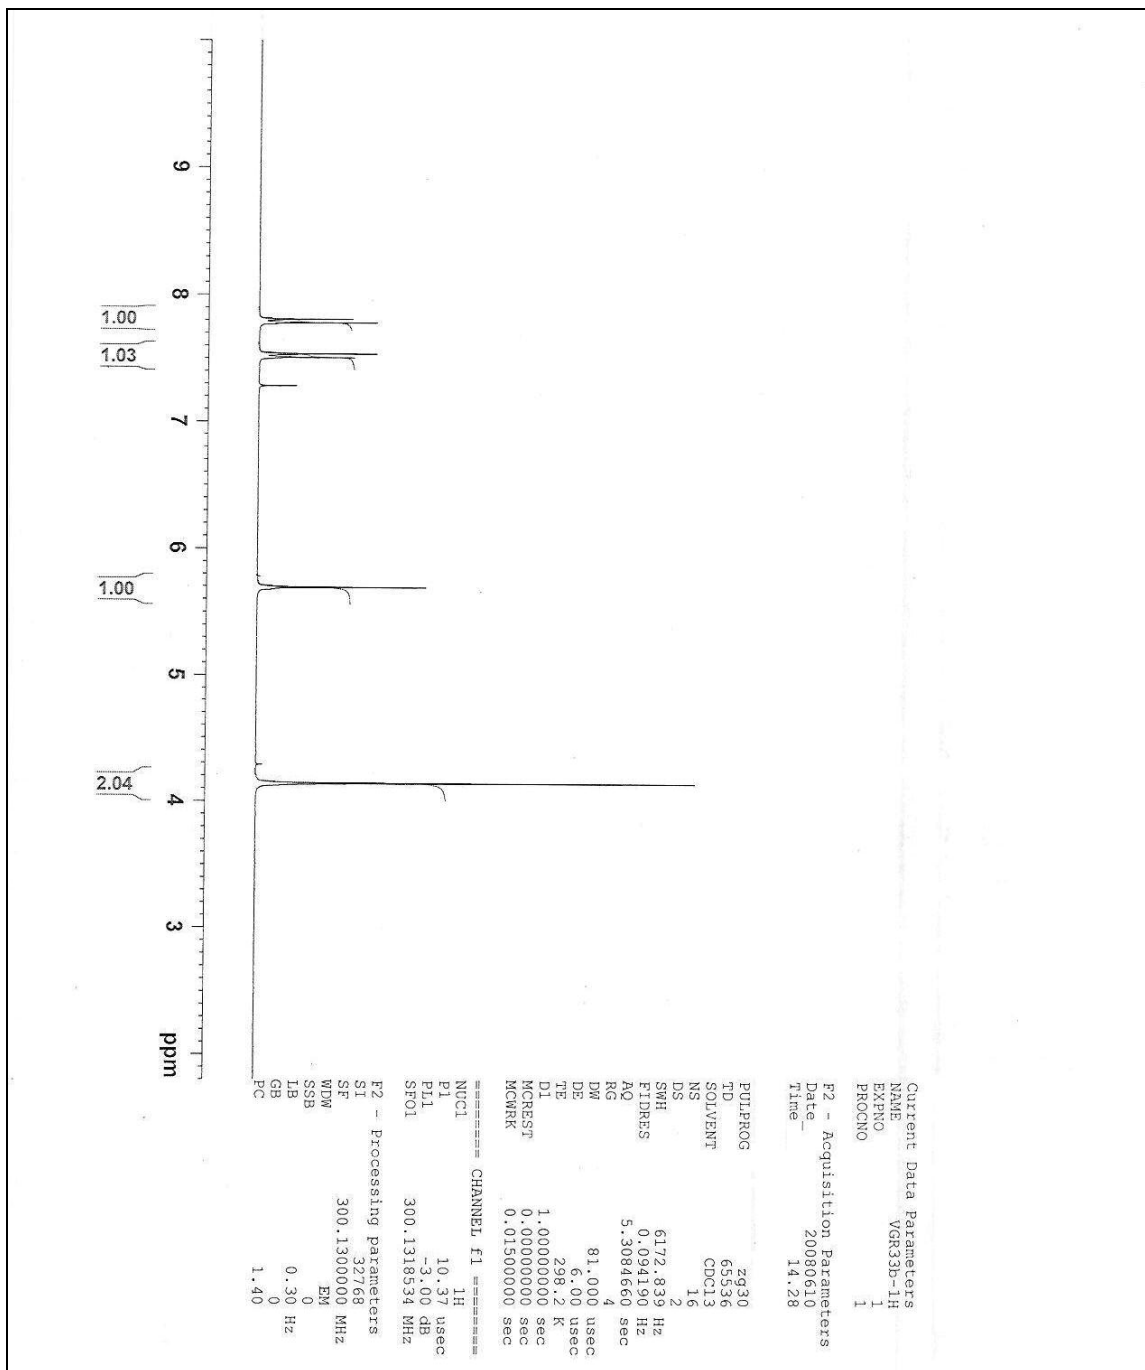

<sup>13</sup>C-NMR spectrum of 2,5-dihydro-1-(4-chloro benzene sulfo)-1H-pyrrole

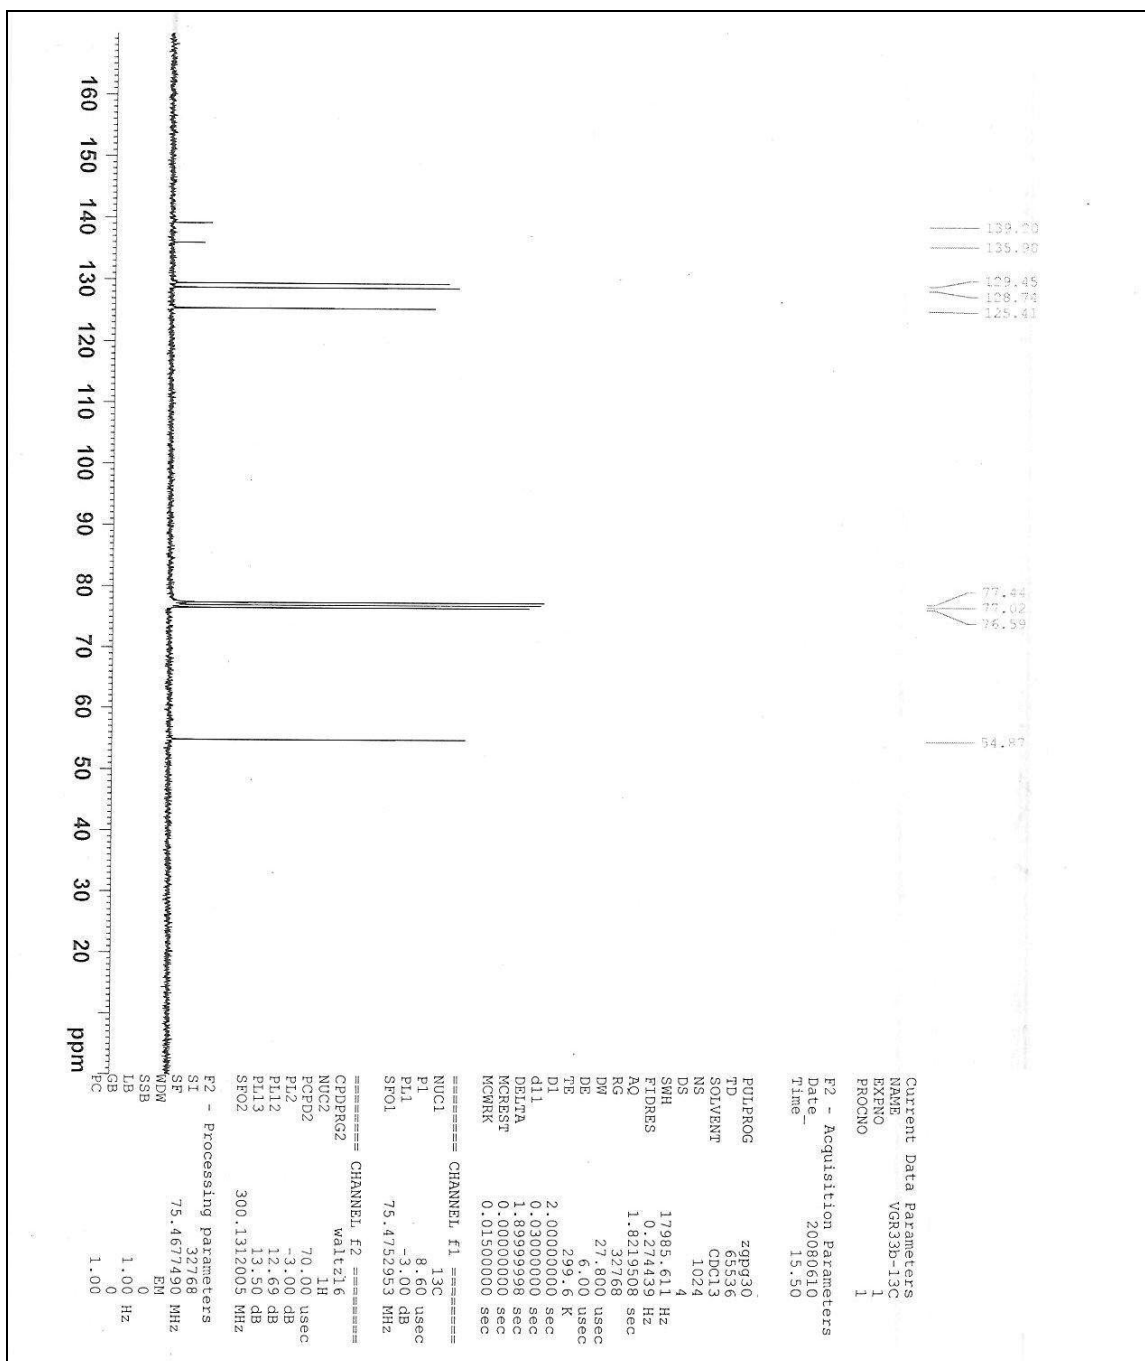

## MS spectrum of 2,5-dihydrofuran

Library Searched : C:\Documents and Settings\lab103cf\Desktop\Transferred Data  
Quality : 92  
ID : 2,5-DIHYDROFURAN

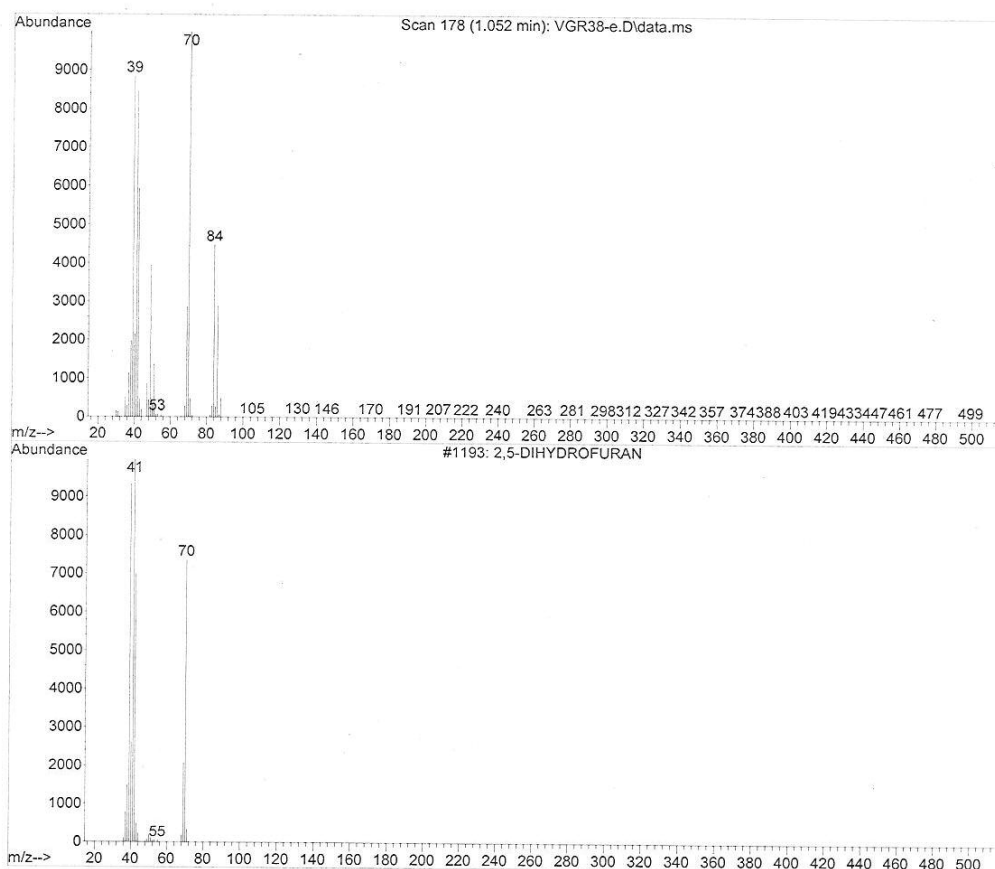

## MS spectrum of 2,5-dihydrothiophene

Library Searched : C:\Documents and Settings\lab103cf\Desktop\Transferred Data  
Quality : 90  
ID : Thiophene, 2,5-dihydro- (CAS) \$\$ .DELTA.3-DIHYDROTHIOP  
HENE \$\$ 2,5-DIHYDRO-THIOPHENE \$\$ 2,5-Dihydrothiophene  
\$\$ DELTA3-DIHYDROTHIOPHENE

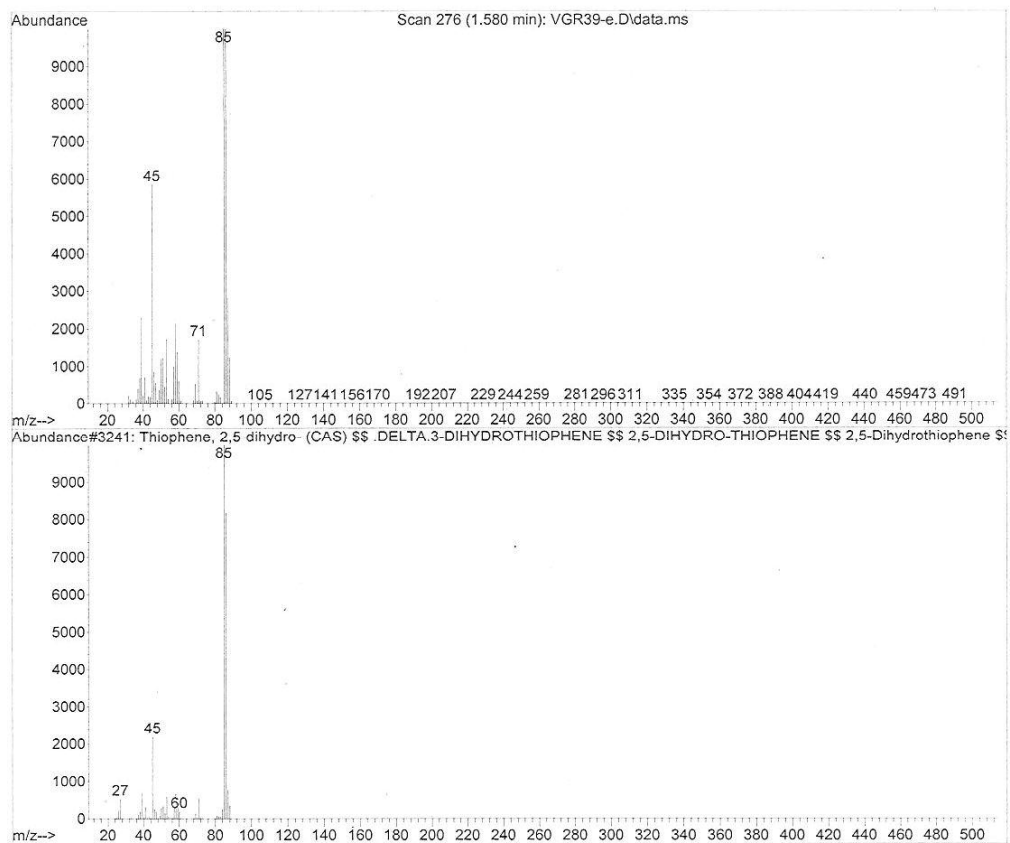

## MS spectrum of diethyl cyclopent-3-ene-1,1-dicarboxylate

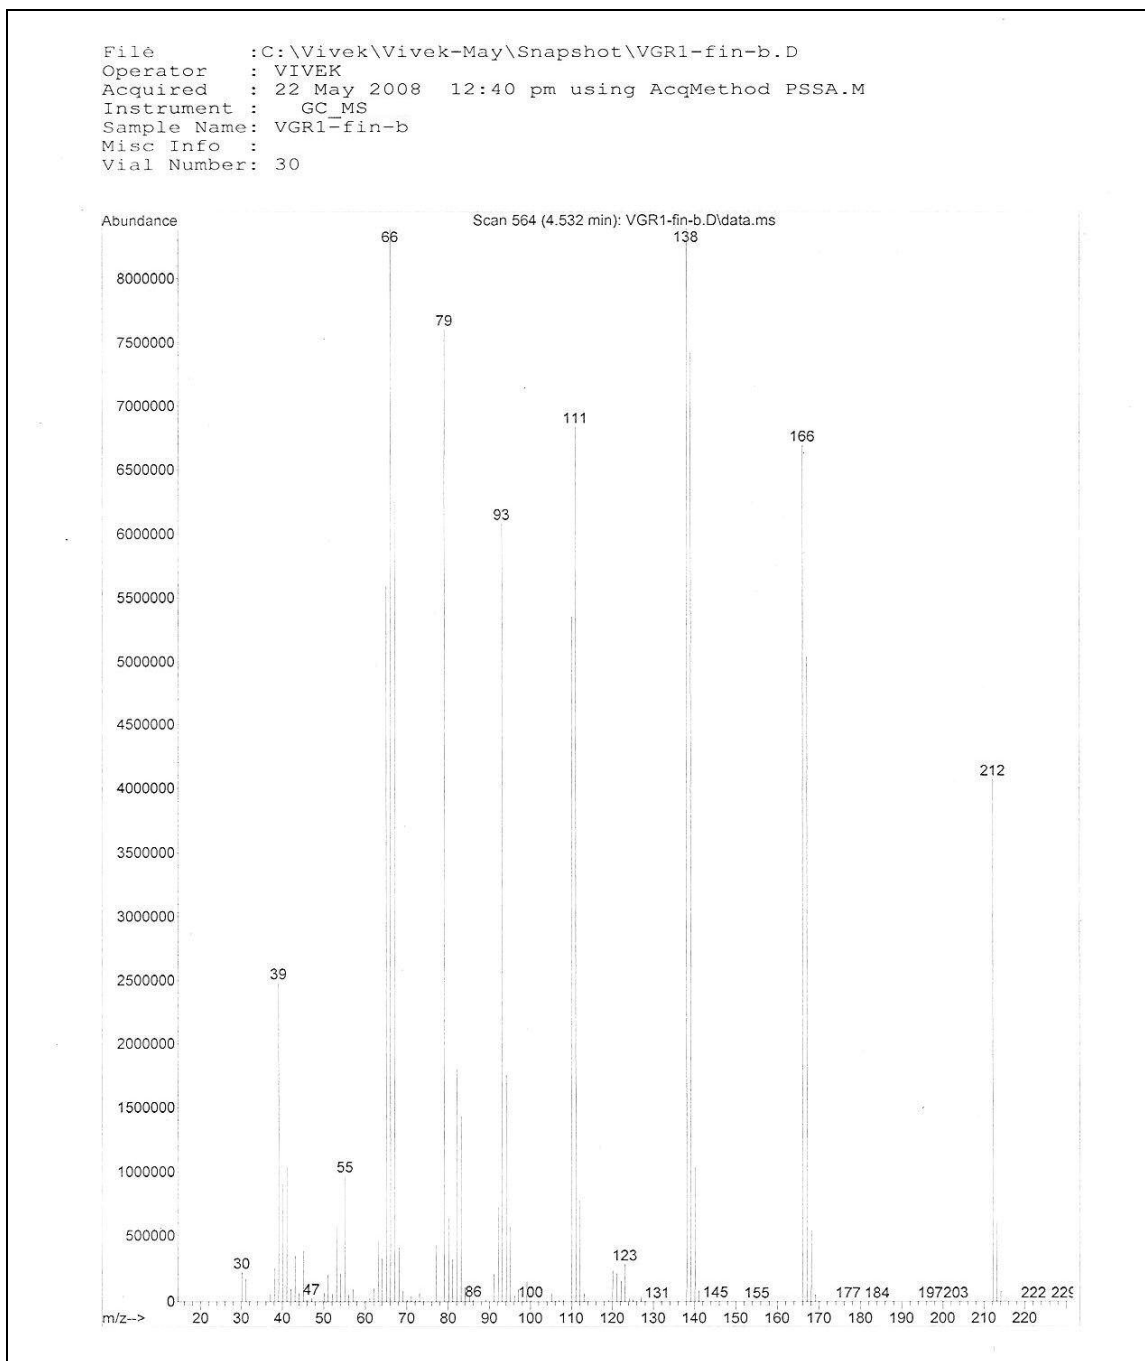



# <sup>1</sup>H -NMR spectrum of diethyl cyclopent-3-ene-1,1-dicarboxylate

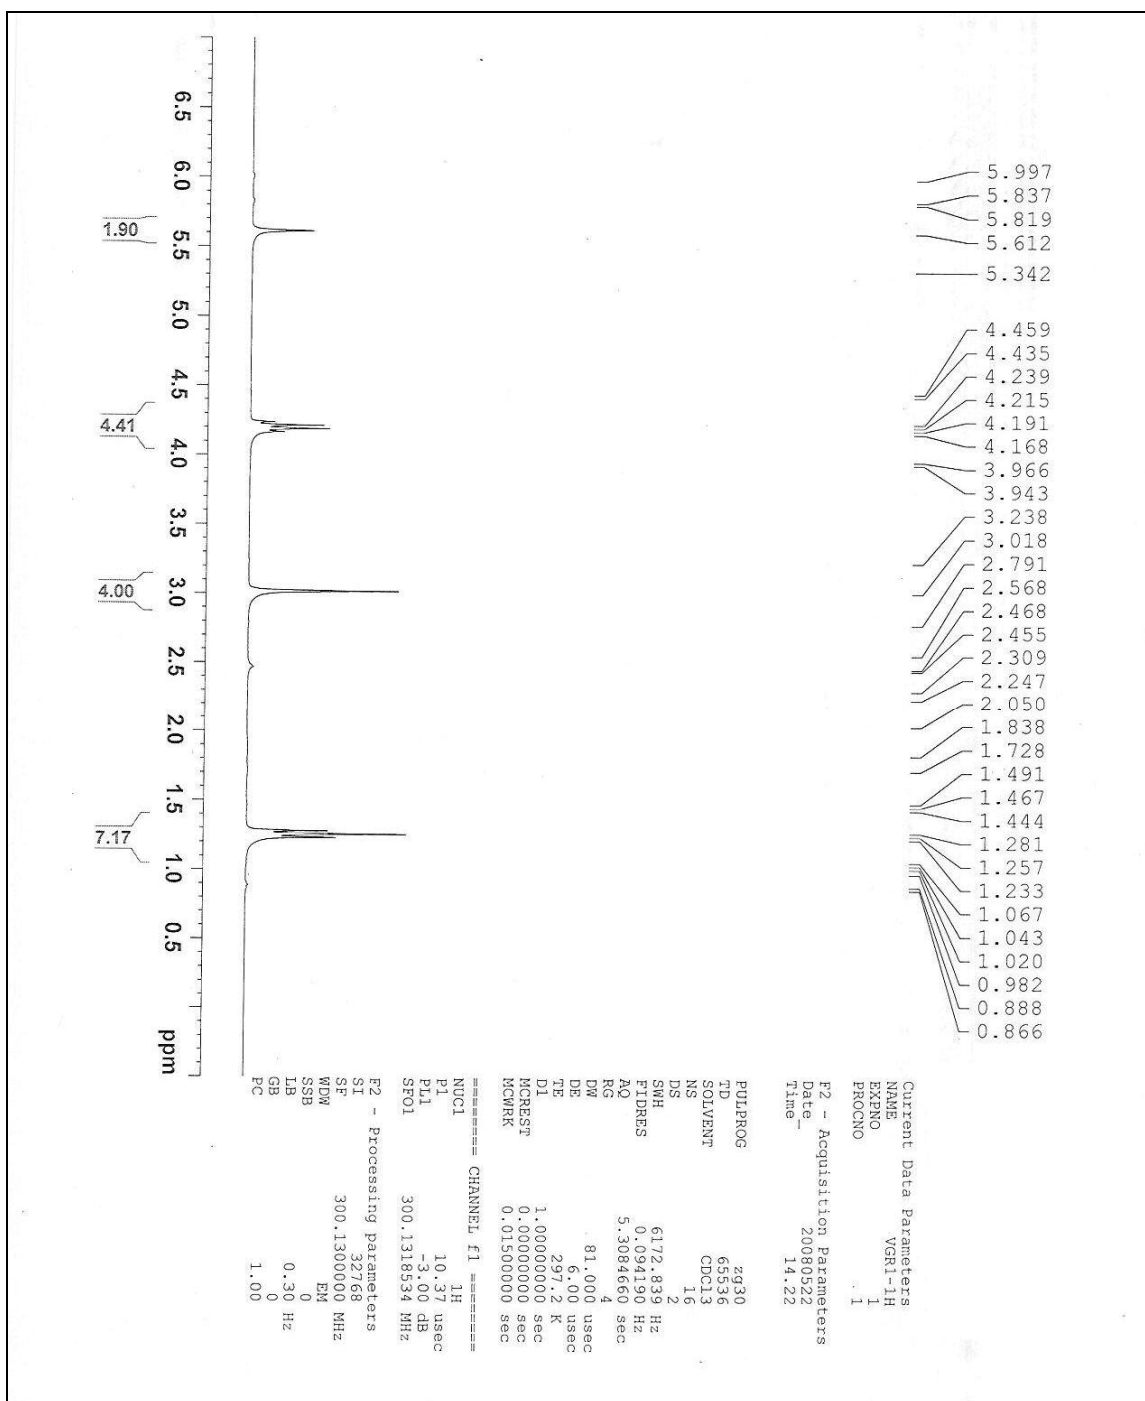

# <sup>13</sup>C-NMR spectrum of diethyl cyclopent-3-ene-1,1-dicarboxylate

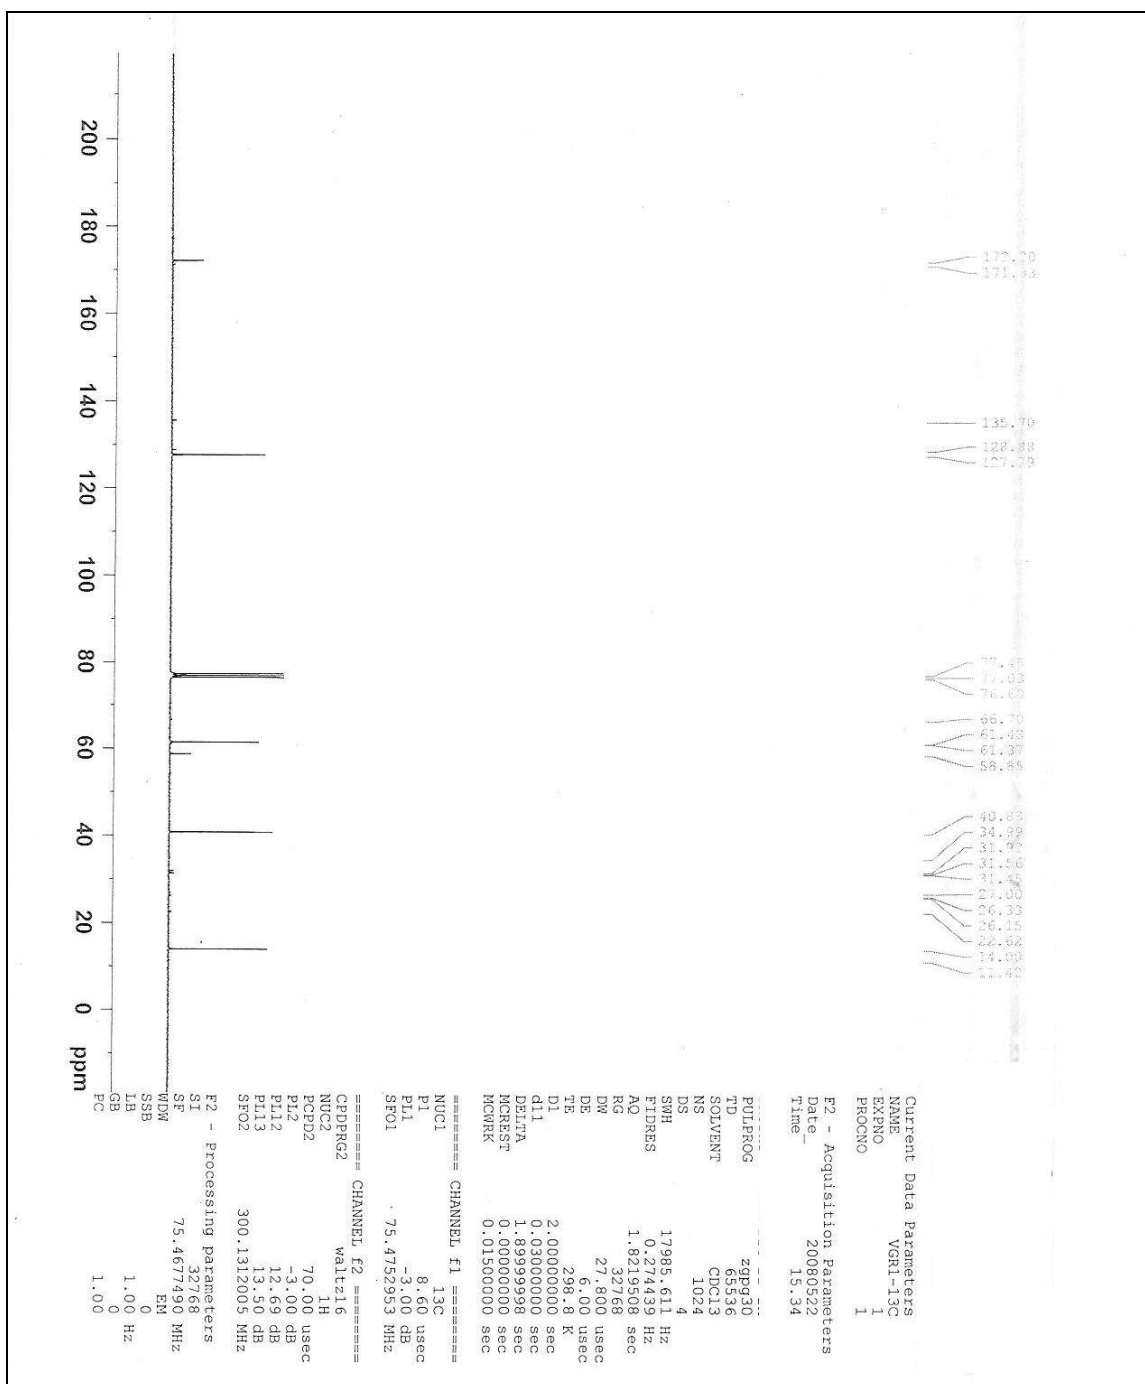

# MS spectrum of 4-chloro-2-(2H-pyrrol-1(5H)-yl)pyrimidine

File :C:\VIVEK\VIVEK-JUNE-08\Snapshot\VGR41f4.D  
Operator : Vivek  
Acquired : 12 Jun 2008 3:18 pm using AcqMethod PSSA.M  
Instrument : GC\_MS  
Sample Name: VGR41f4  
Misc Info :  
Vial Number: 29

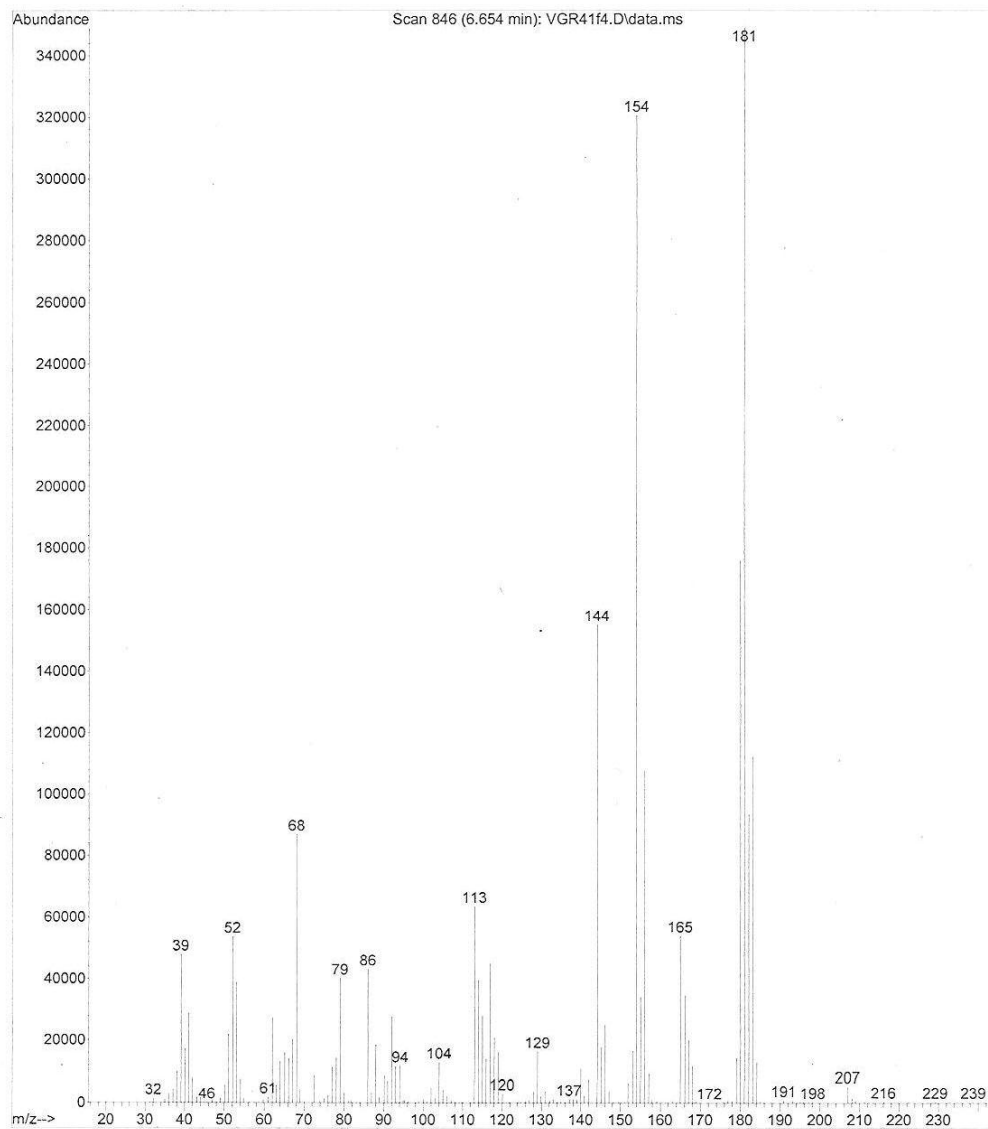

<sup>1</sup>H -NMR spectrum of 4-chloro-2-(2H-pyrrol-1(5H)-yl)pyrimidine

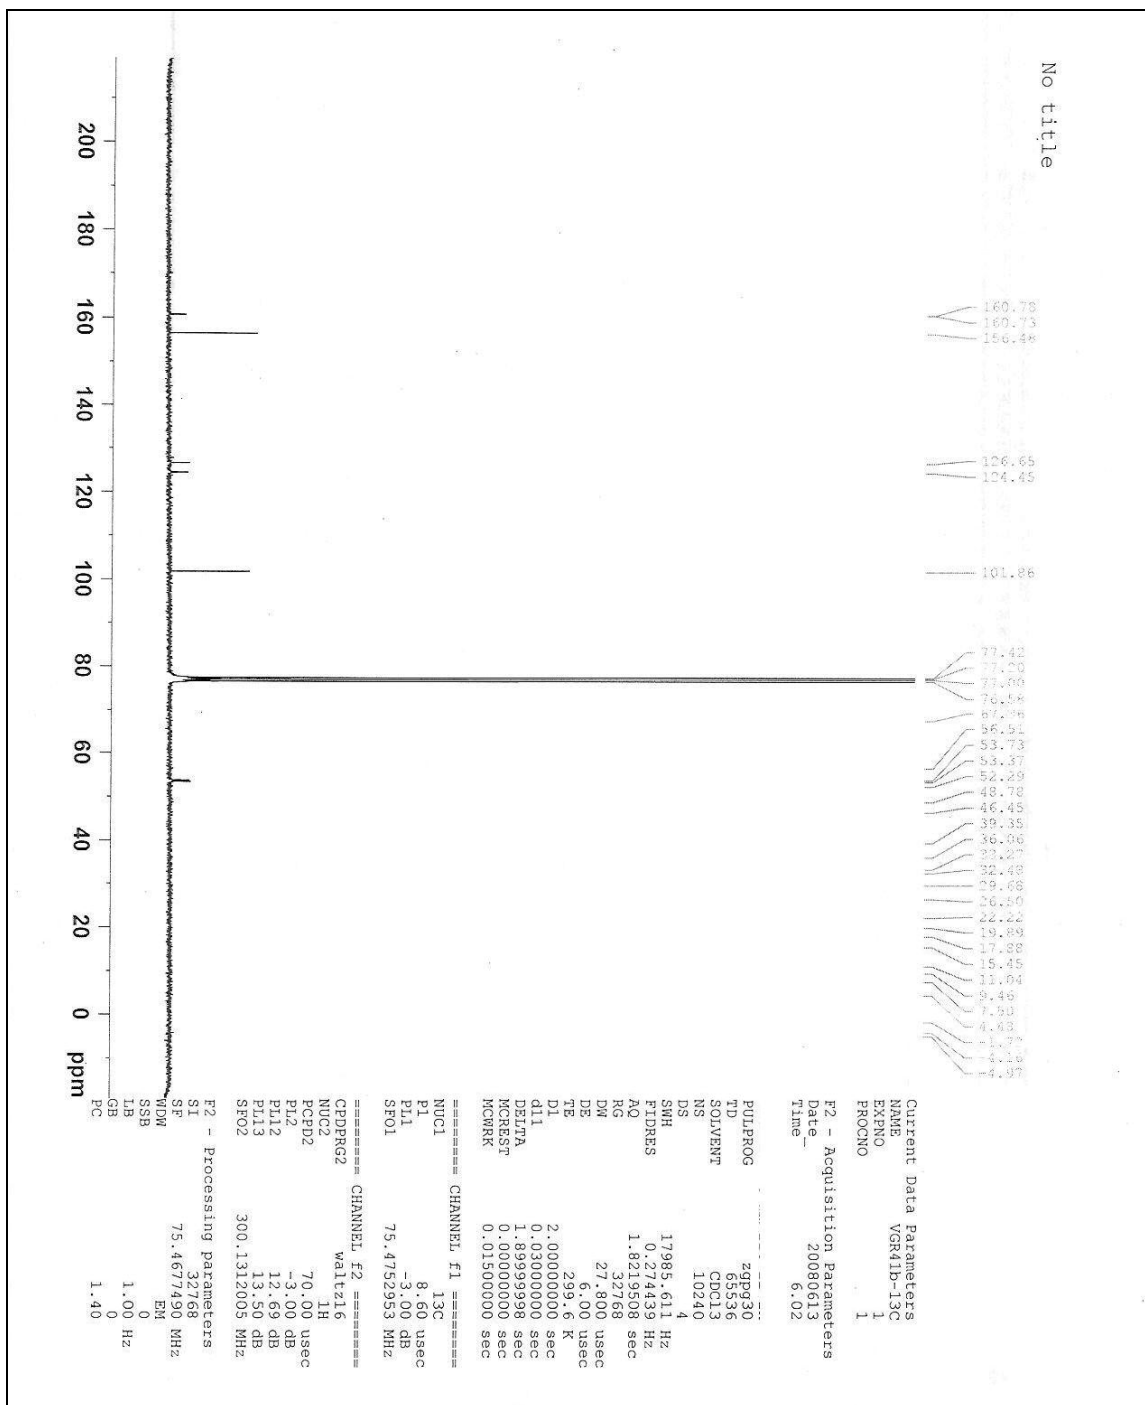

**$^{13}\text{C}$ -NMR spectrum of 4-chloro-2-(2H-pyrrol-1(5H)-yl)pyrimidine**

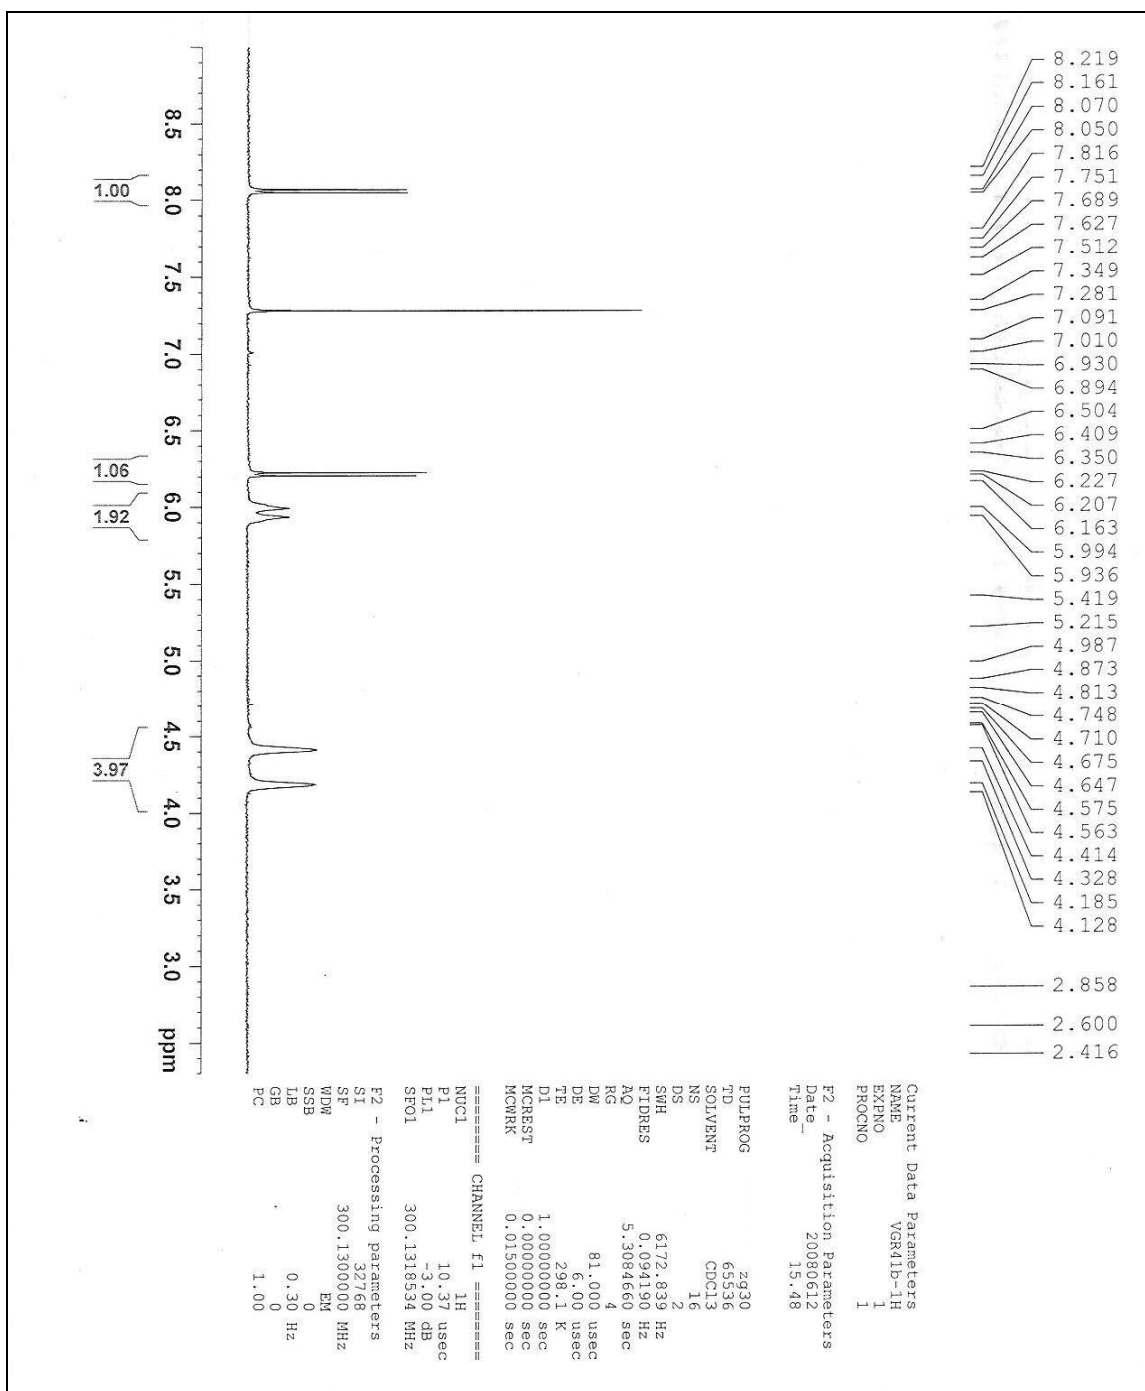

## MS spectrum of triethyl(styryl)silane

File :C:\Vivek\Vivek-May\VGR10f1.D  
Operator : VIVEK  
Acquired : 28 May 2008 1:19 pm using AcqMethod PSSA.M  
Instrument : GC MS  
Sample Name: VGR10f1  
Misc Info :  
Vial Number: 27

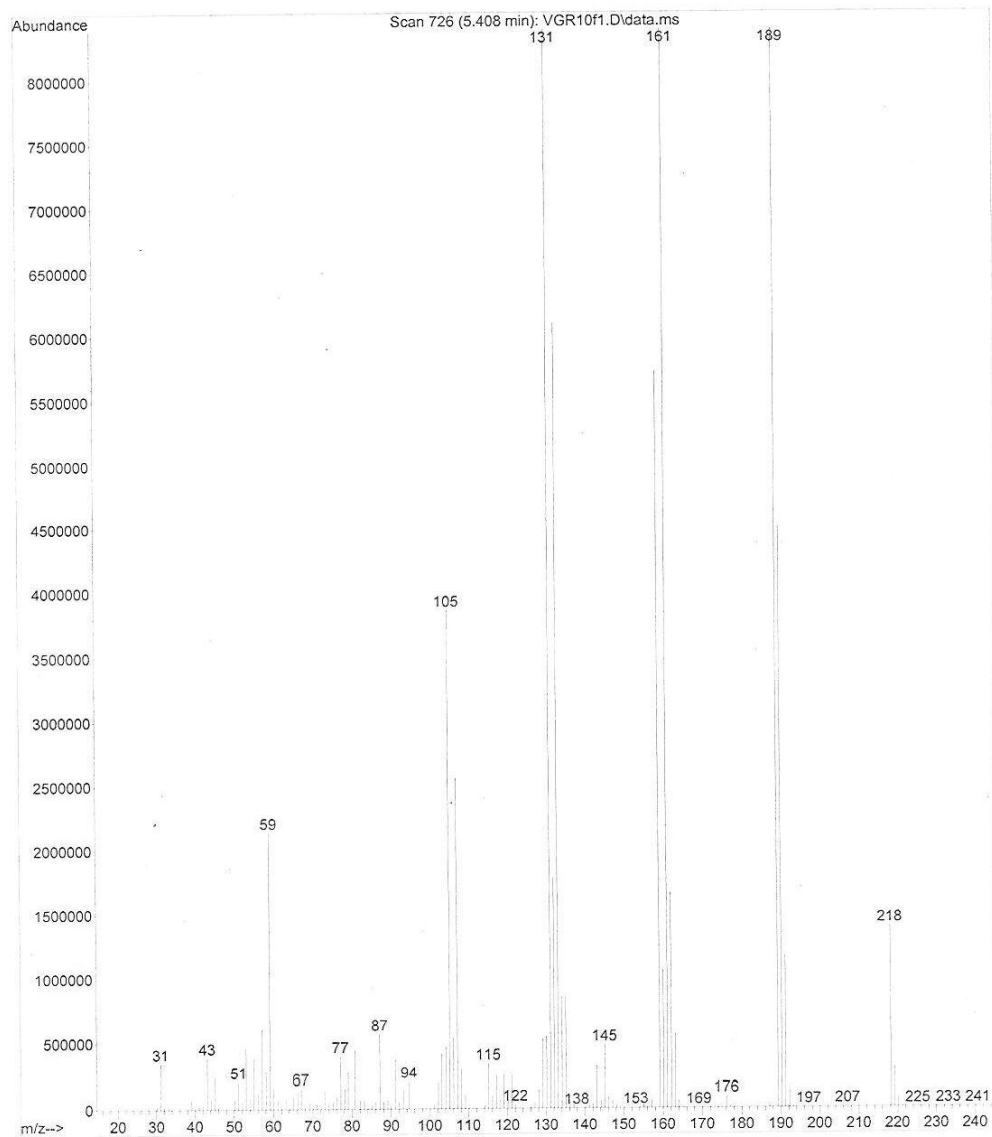

# <sup>1</sup>H -NMR spectrum of triethyl(styryl)silane

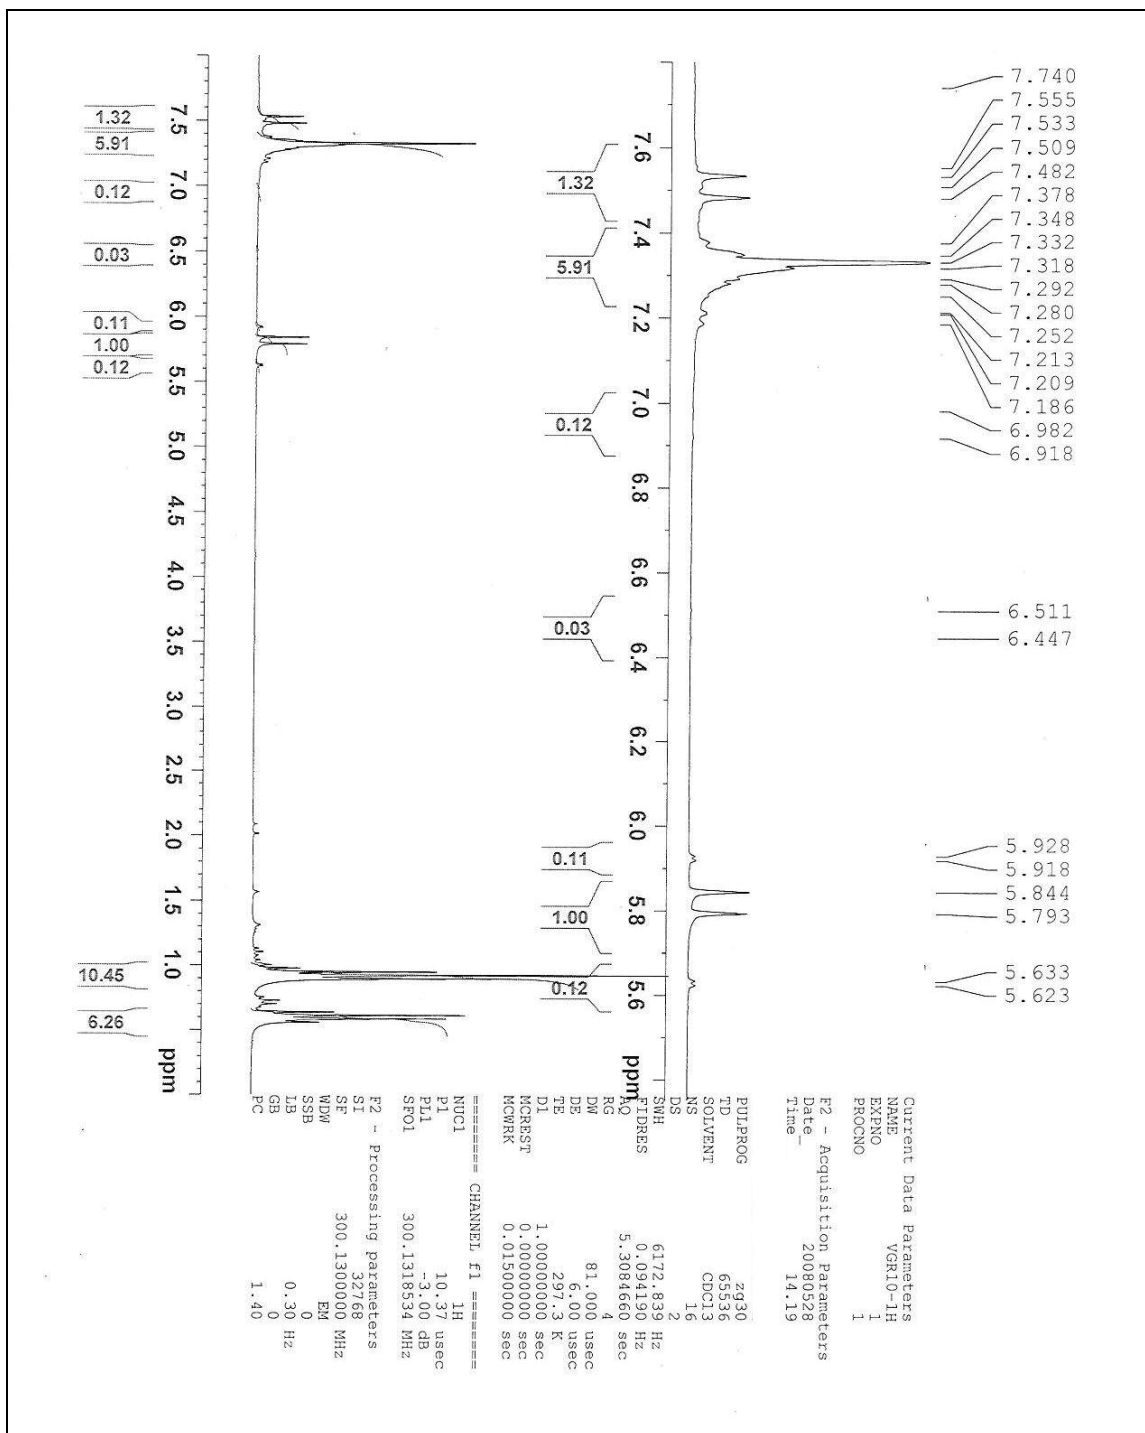

## MS spectrum of (4-fluorostyryl)triethylsilane

File :C:\Vivek\Vivek-May\VGR11f1.D  
Operator : VIVEK  
Acquired : 28 May 2008 3:13 pm using AcqMethod PSSA.M  
Instrument : GC MS  
Sample Name: VGR11f1  
Misc Info :  
Vial Number: 30

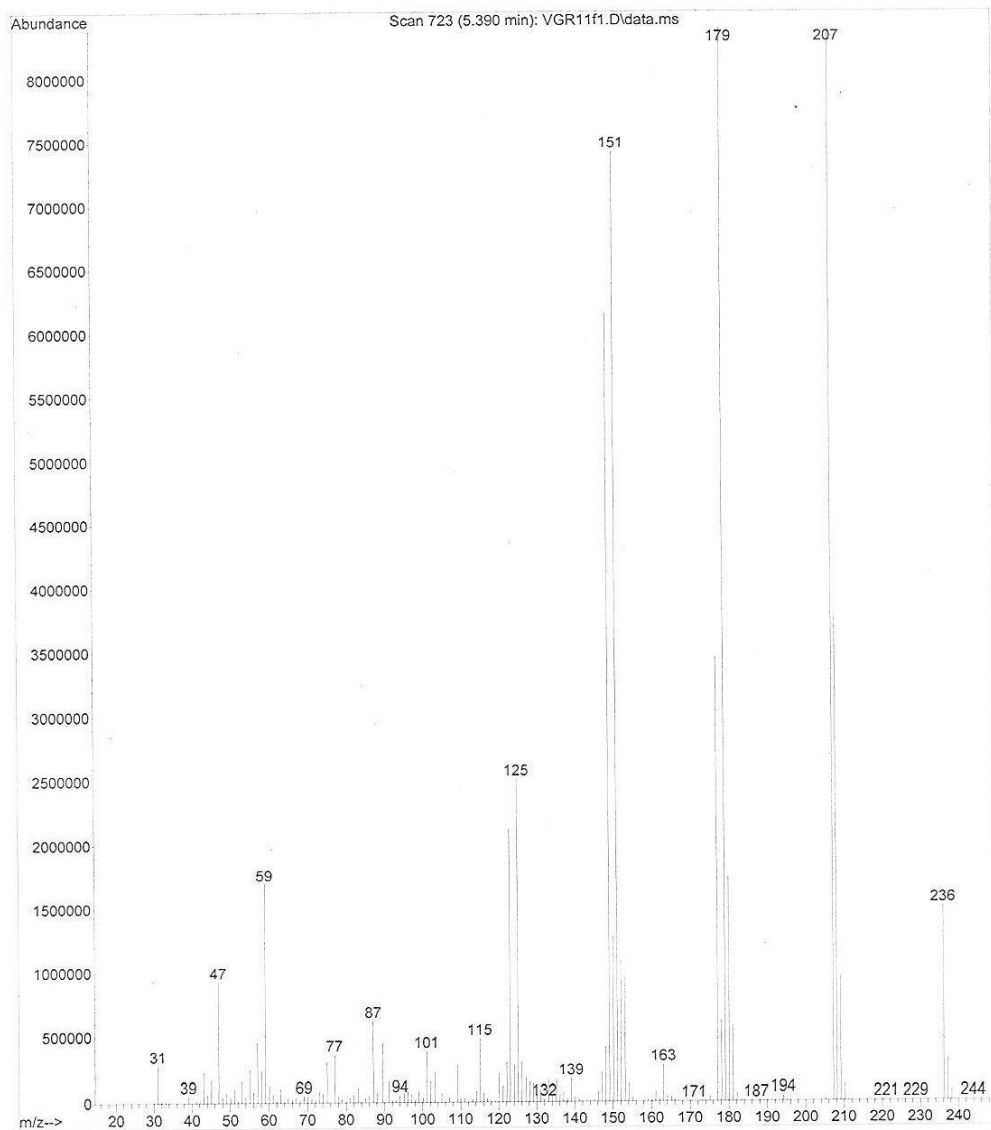



# <sup>1</sup>H -NMR spectrum of (4-fluorostyryl)triethylsilane

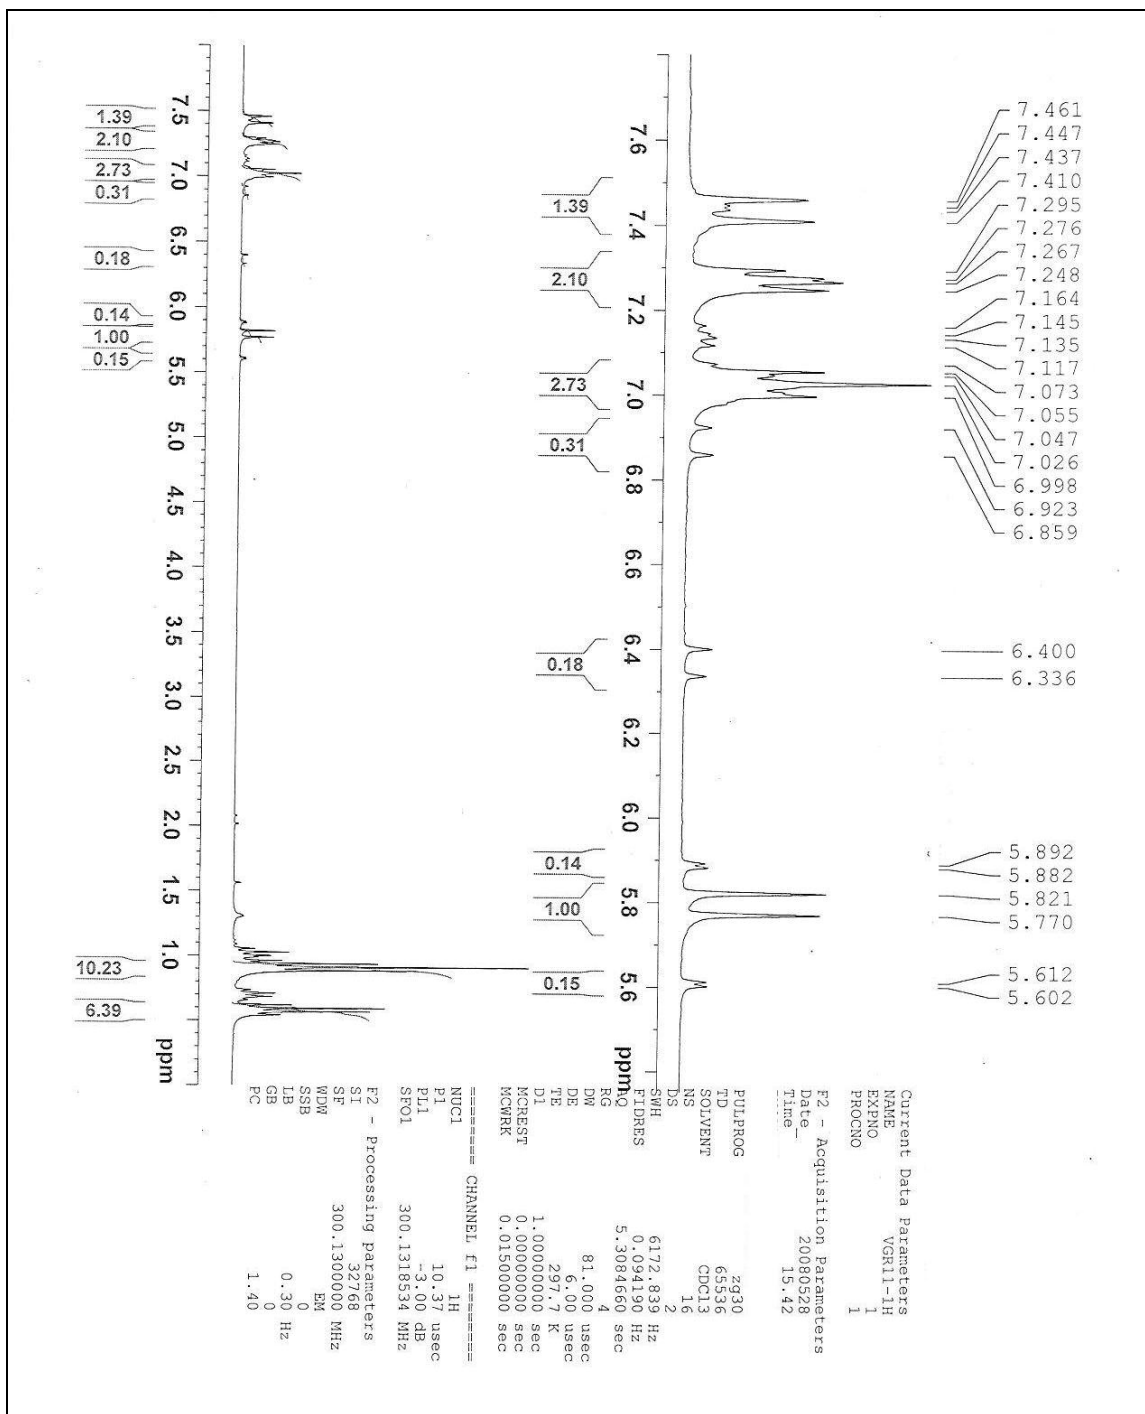

## MS spectrum of (4-methoxystyryl)triethylsilane

File :C:\Vivek\Vivek-May\VGR13f1.D  
Operator : VIVEK  
Acquired : 30 May 2008 1:13 pm using AcqMethod PSSA.M  
Instrument : GC\_MS  
Sample Name: VGR13f1  
Misc Info :  
Vial Number: 27

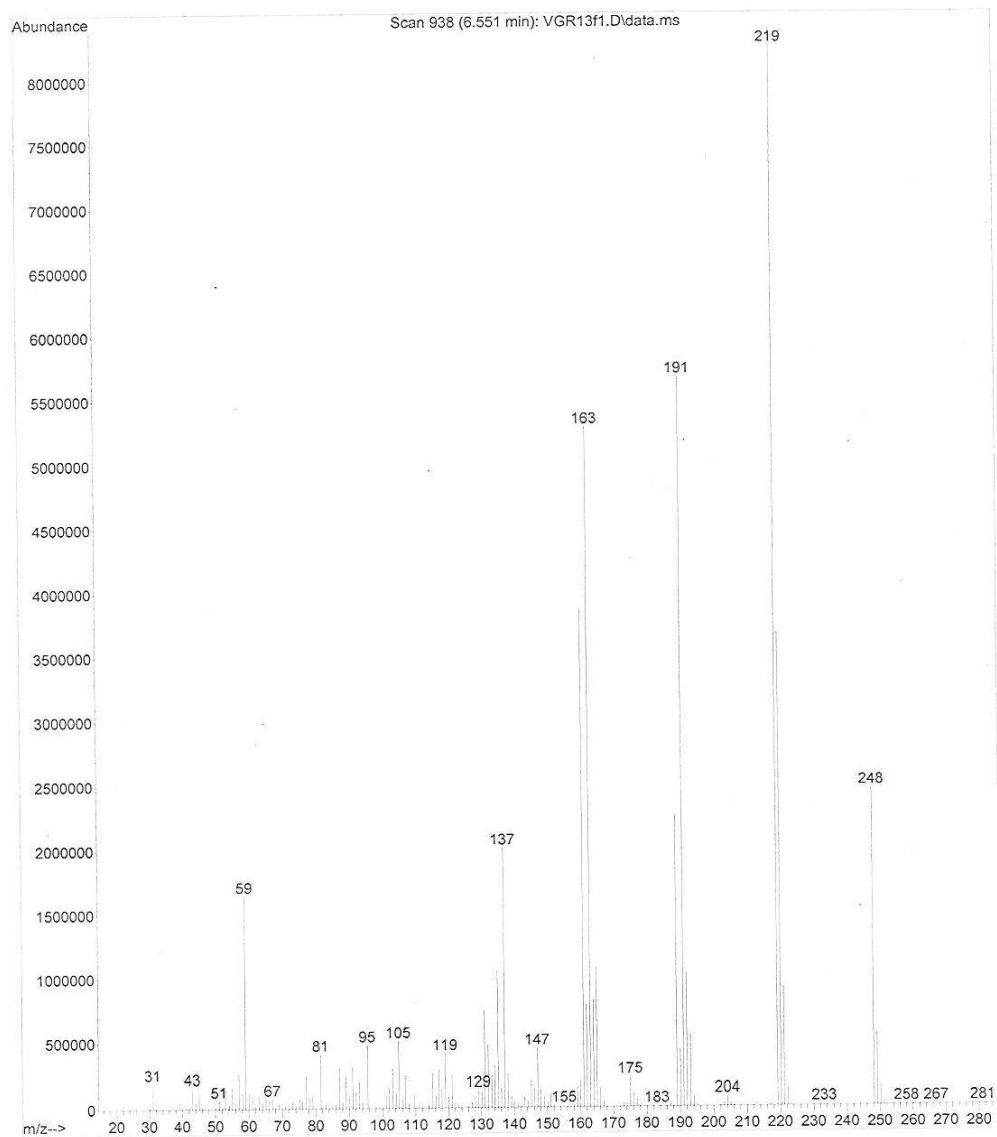

<sup>1</sup>H -NMR spectrum of (4-methoxystyryl)triethylsilane

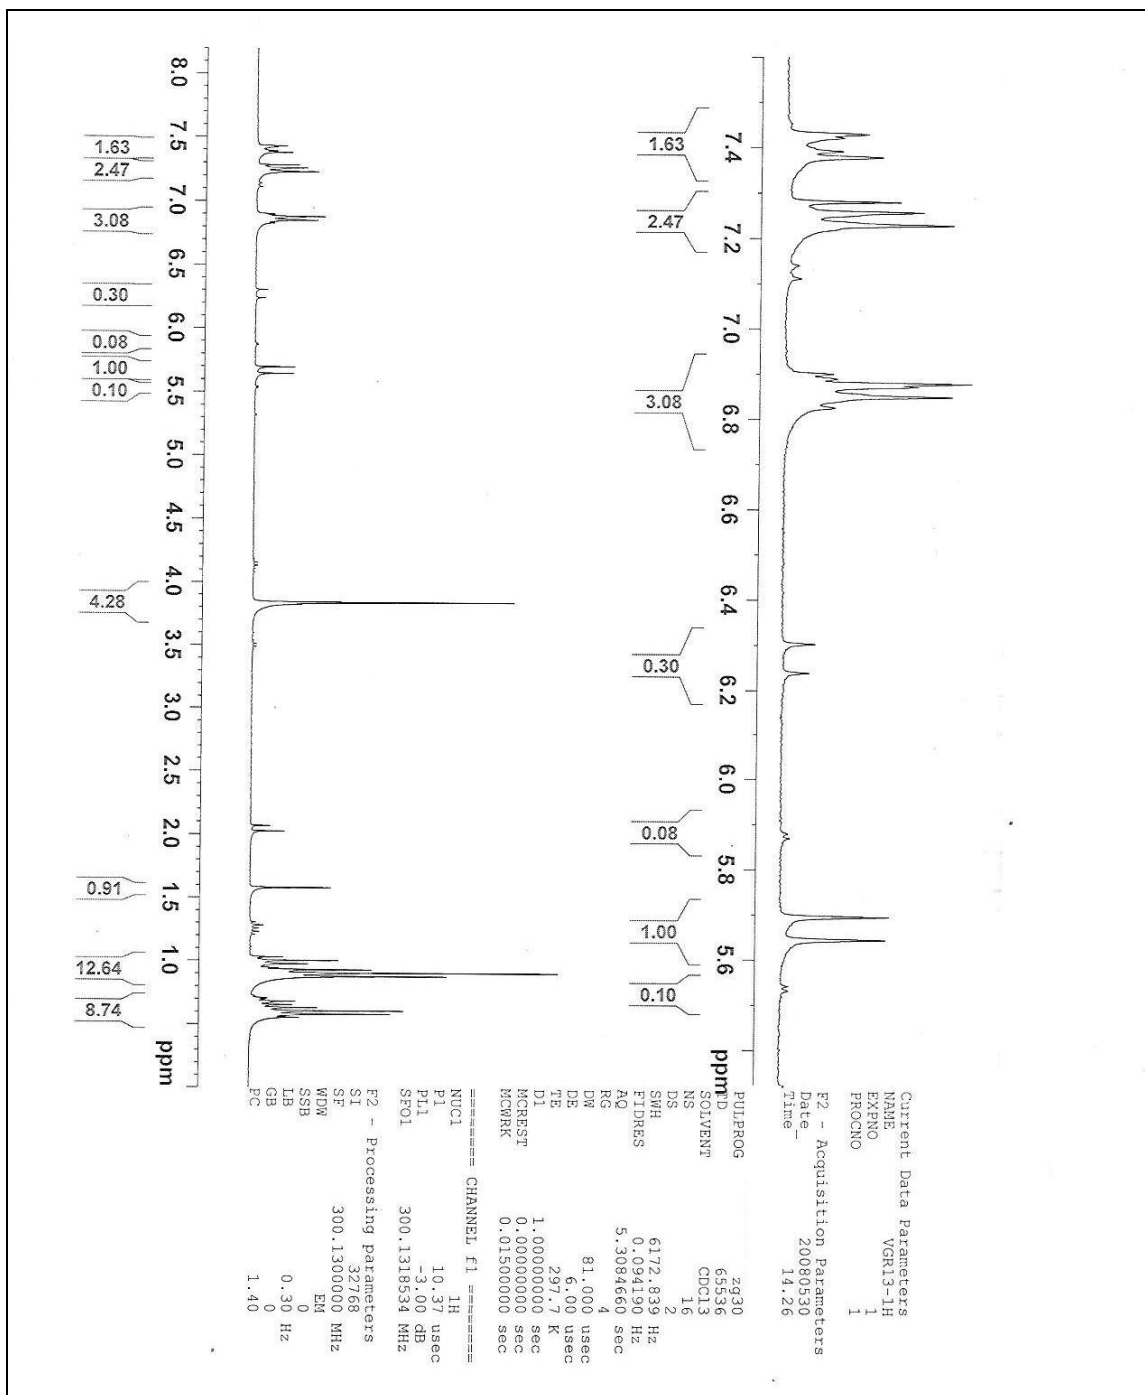

## MS spectrum of triphenyl(styryl)silane

File :C:\Vivek\Vivek-May\VGR14b.D  
Operator : VIVEK  
Acquired : 30 May 2008 9:42 am using AcqMethod PSSA.M  
Instrument : GC\_MS  
Sample Name: VGR14b  
Misc Info :  
Vial Number: 30

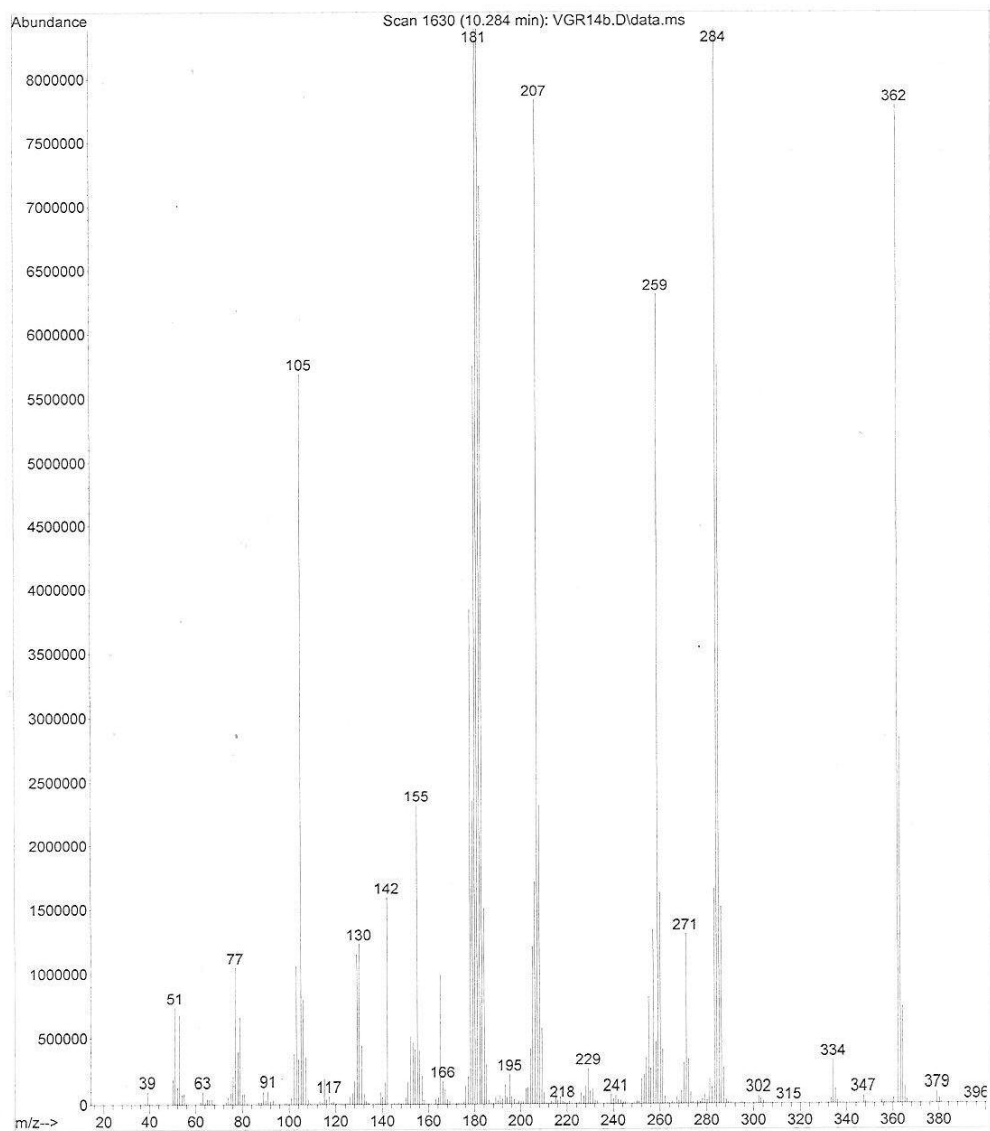

# <sup>1</sup>H -NMR spectrum of triphenyl(styryl)silane

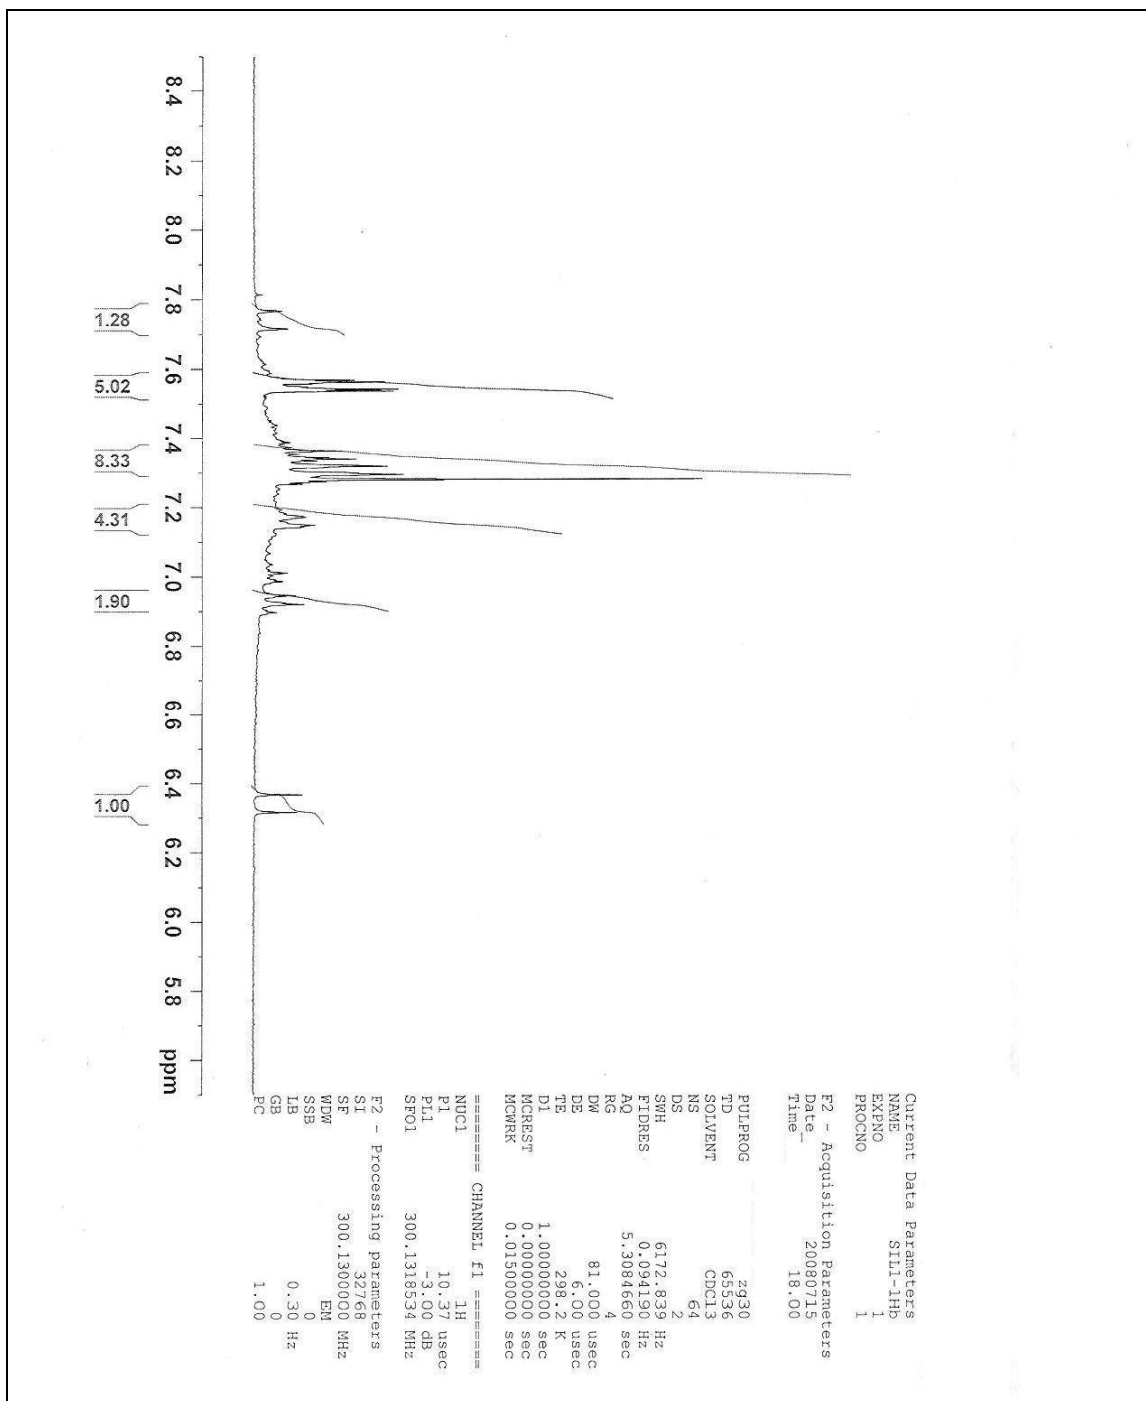

## MS spectrum of (4-fluorostyryl)triphenylsilane

File :C:\Vivek\Vivek-May\VGR15b.D  
Operator : VIVEK  
Acquired : 30 May 2008 10:03 am using AcqMethod PSSA.M  
Instrument : GC\_MS  
Sample Name: VGR15b  
Misc Info :  
Vial Number: 29

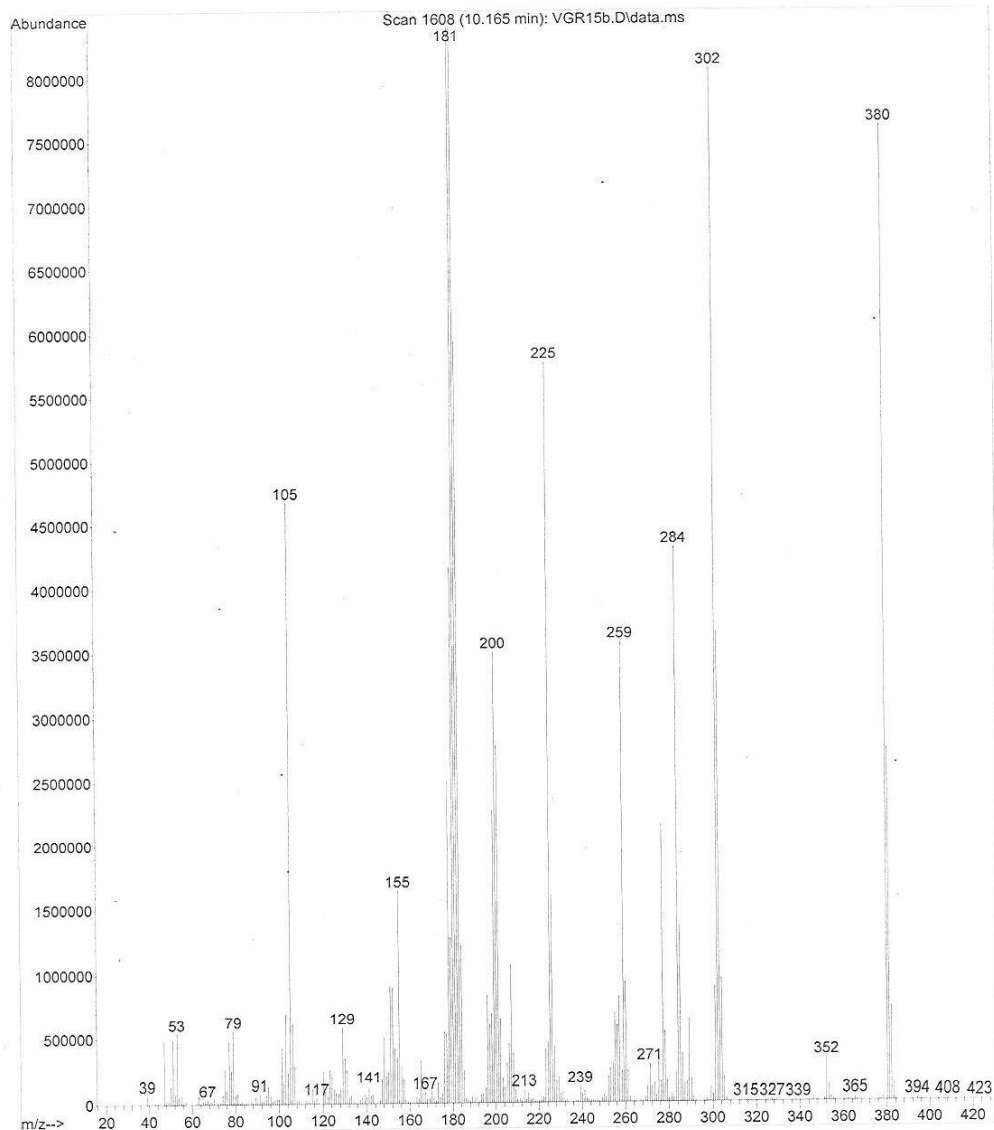

# <sup>1</sup>H -NMR spectrum of (4-fluorostyryl)triphenylsilane

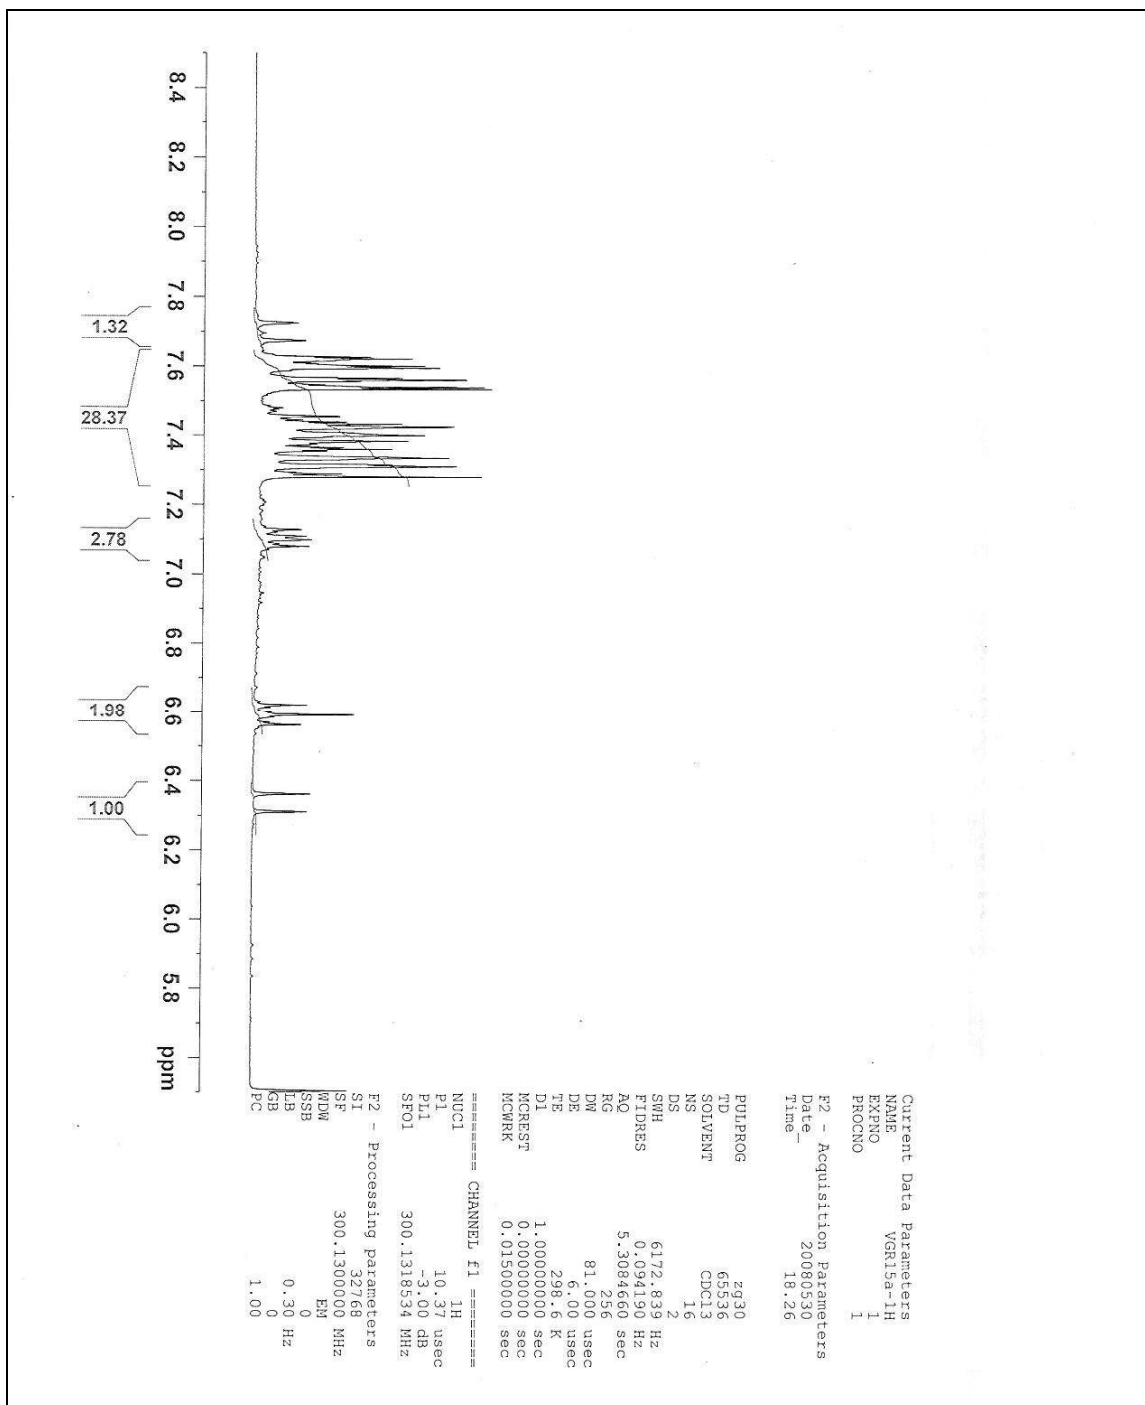

## MS spectrum of (4-methoxystyryl)triphenylsilane

File :C:\Vivek\Vivek-May\VGR16f1.D  
Operator : VIVEK  
Acquired : 30 May 2008 5:53 pm using AcqMethod PSSA.M  
Instrument : GC\_MS  
Sample Name: VGR16f1  
Misc Info :  
Vial Number: 26

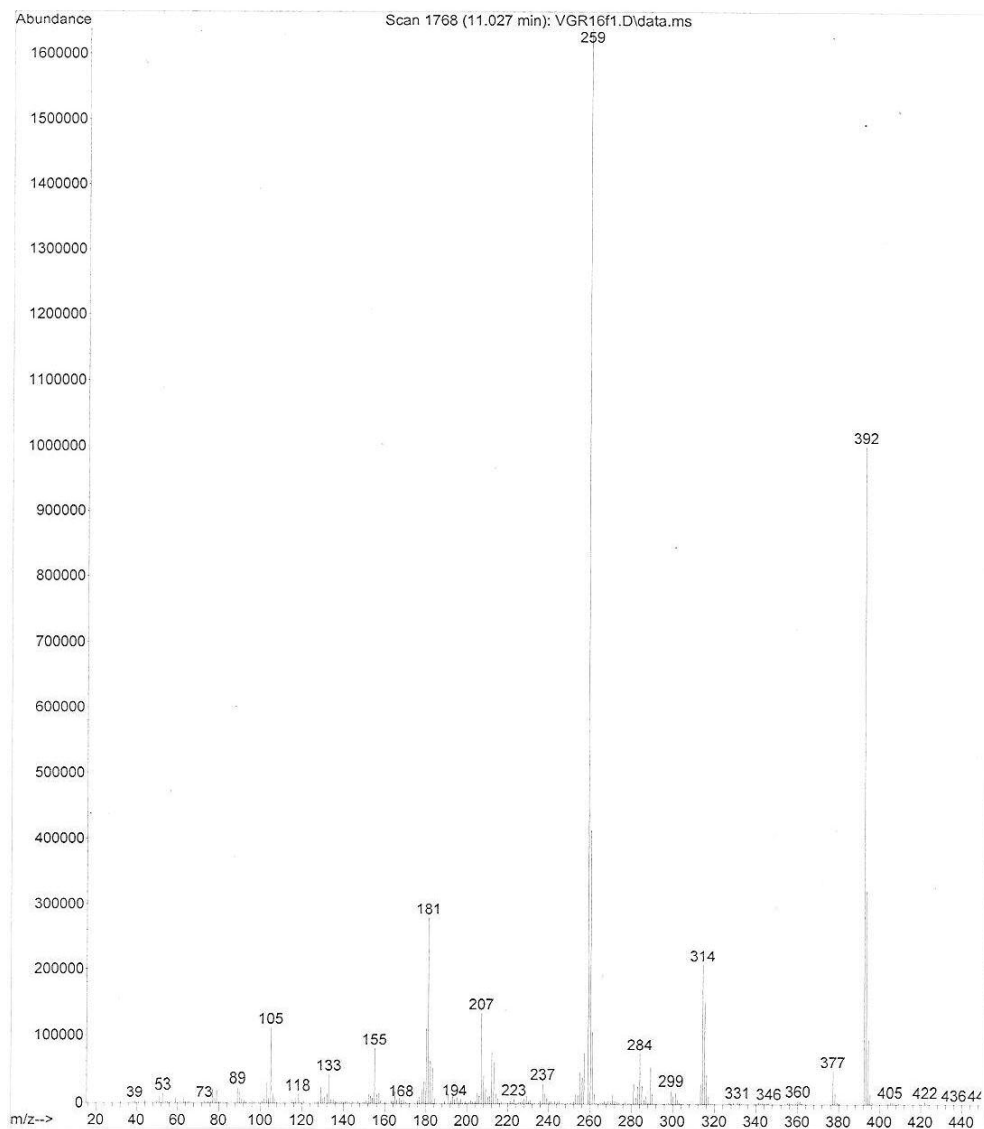



# <sup>1</sup>H -NMR spectrum of (4-methoxystyryl)triphenylsilane

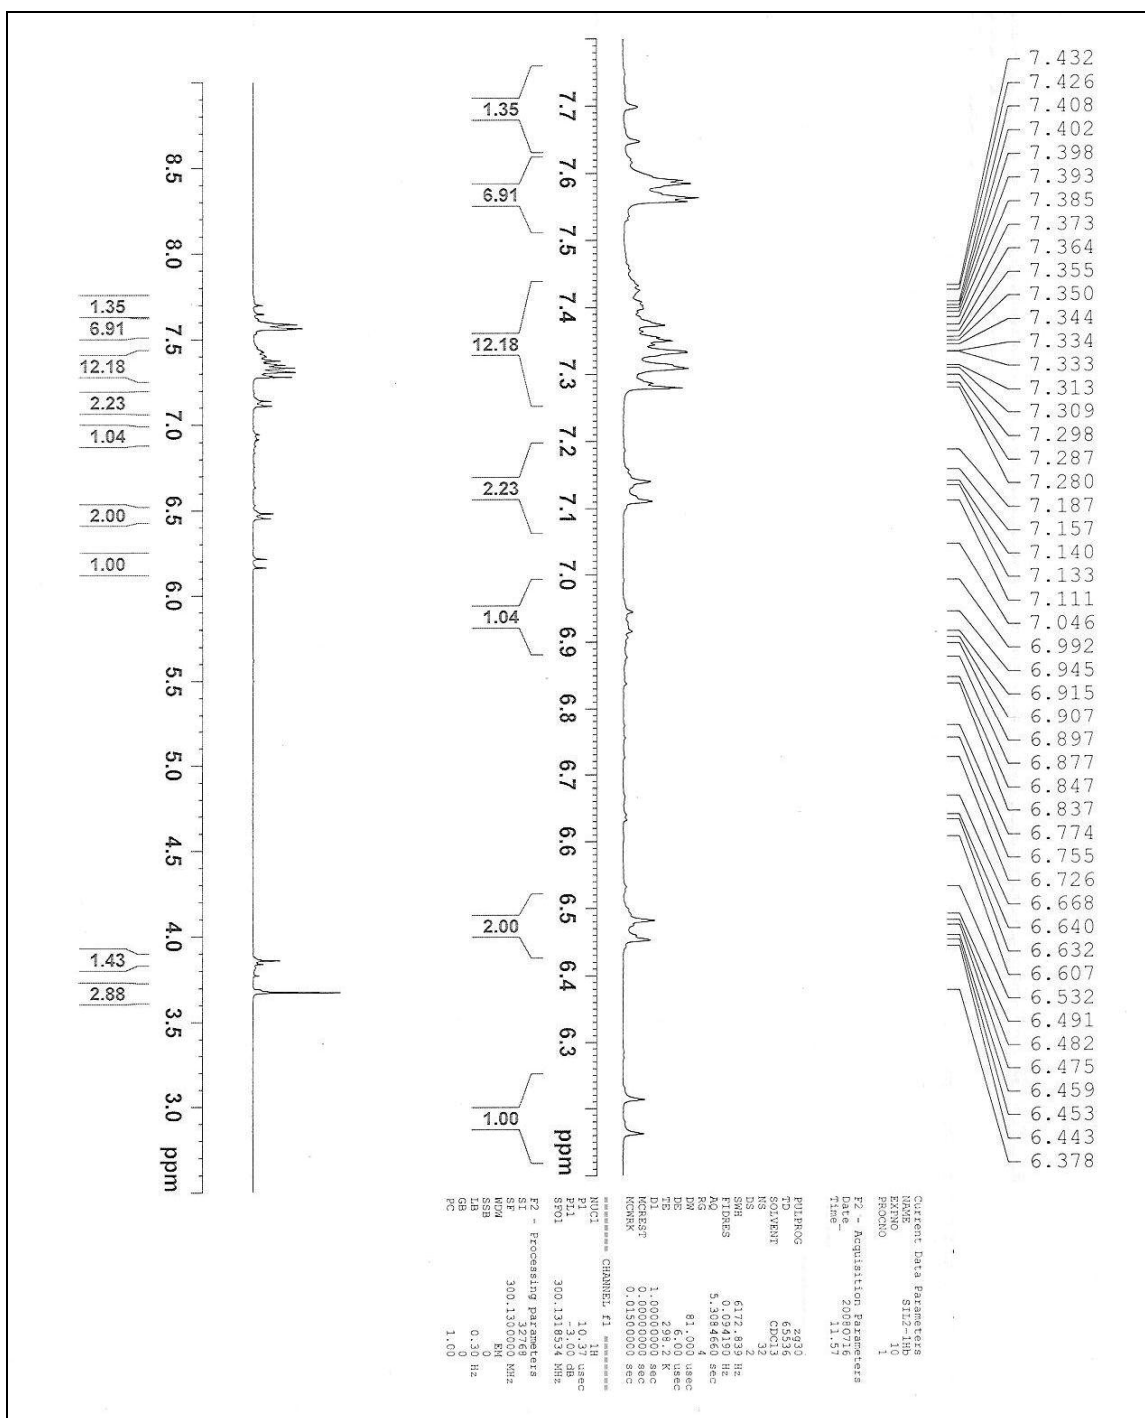

## MS spectrum of 6-(triethylsilyl)vinylquinoxaline

File :C:\Vivek\Vivek-July-08\sil6-f2.D  
Operator : vivek  
Acquired : 15 Jul 2008 12:18 pm using AcqMethod PSSA.M  
Instrument : GC\_MS  
Sample Name: sil6-f2  
Misc Info :  
Vial Number: 30

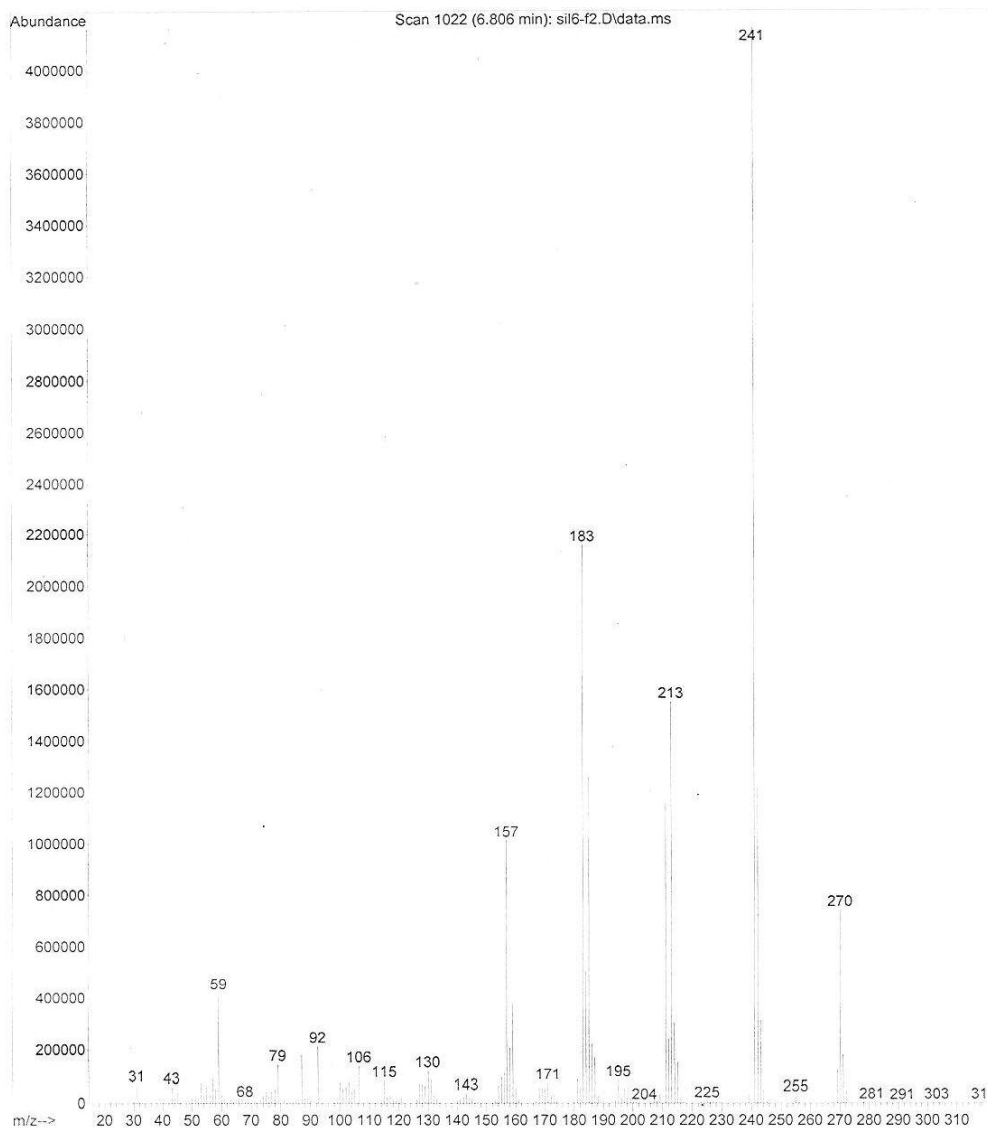

# <sup>1</sup>H -NMR spectrum of 6-(triethylsilyl)vinylquinoxaline

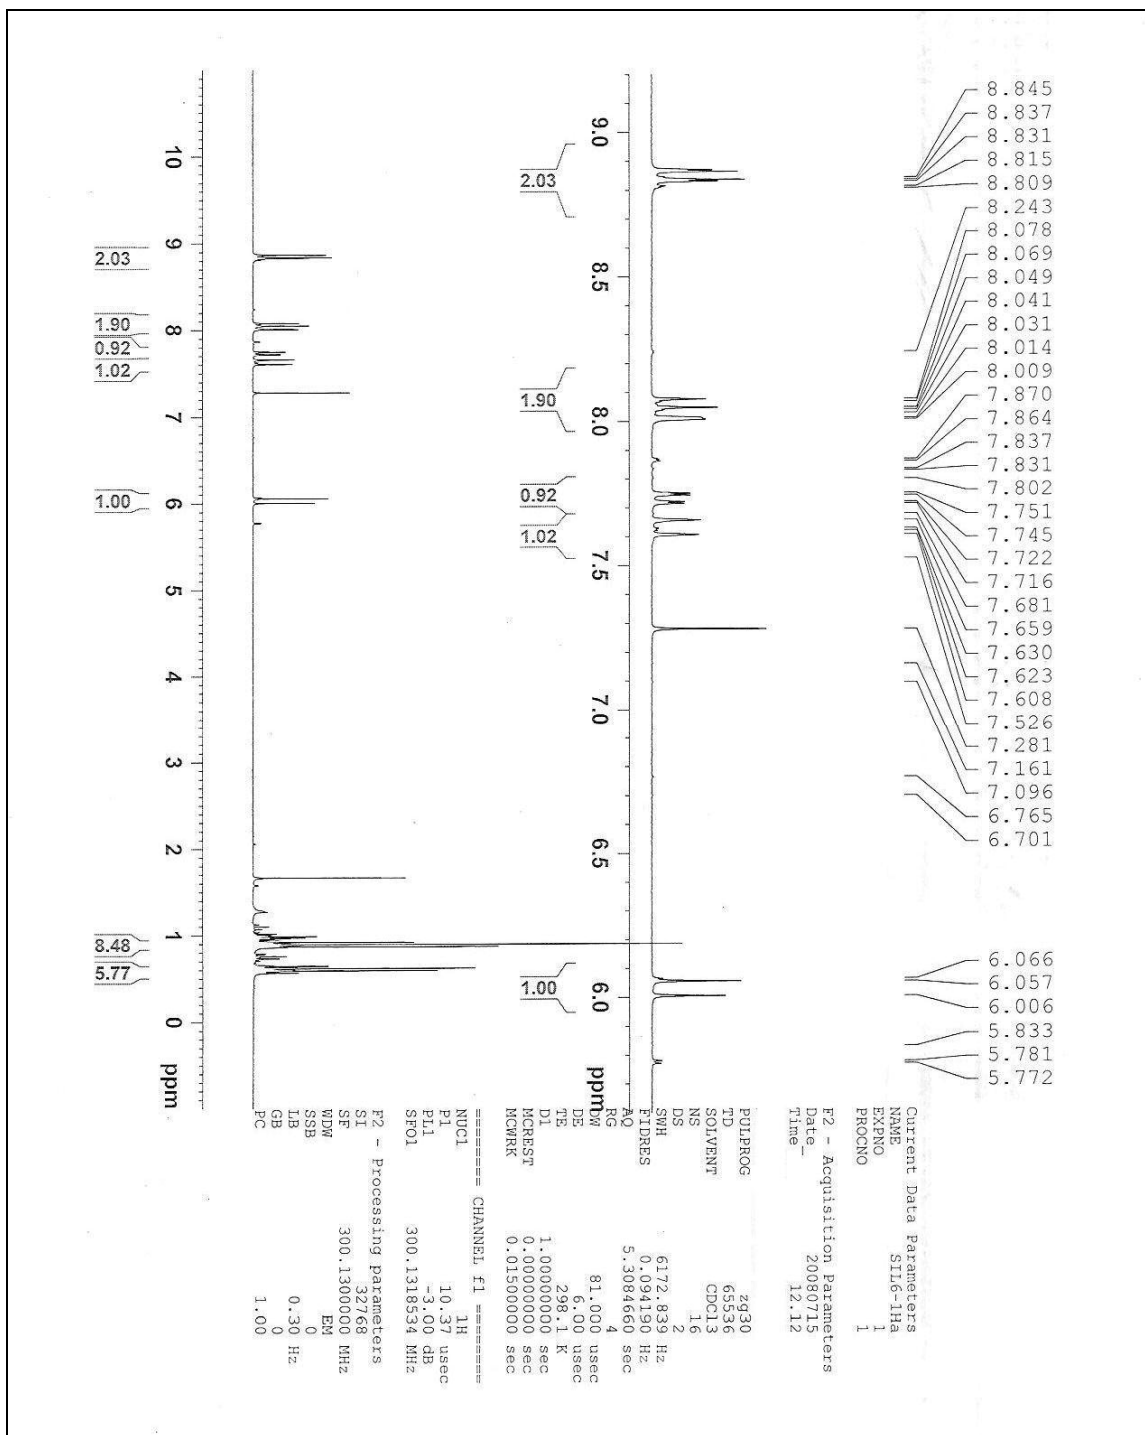

Supplement: Supplementary file 1 [file 4611157]
